# Supplementary material for: Click synthesis of dendronized malonates for the preparation of amphiphilic dendro[60]fullerenes
Source: Royal Society of Chemistry journal article supplement (doi:10.1039/d3ob01986a), 2024-01-01
Supplement: d3ob01986a1.pdf [file d3ob01986a1.pdf]

## Click Synthesis of Dendronized Malonates for the Preparation of Amphiphilic Dendro[60]fullerenes

Carlos Cruz-Hernández<sup>1</sup>, Perla Y. López-Camacho<sup>1</sup>, Gustavo Basurto-Islas<sup>2</sup>, Aaron Rojas<sup>3</sup>, Patricia Guadarrama<sup>4</sup>, Melchor Martínez-Herrera<sup>1\*</sup>

<sup>1</sup> Departamento de Ciencias Naturales, Universidad Autónoma Metropolitana Unidad Cuajimalpa, CDMX, 05300, México.

<sup>2</sup> División de Ciencias e Ingenierías, Universidad de Guanajuato, Campus León, León, Gto., México.

<sup>3</sup> Departamento de Química del Centro de Investigación y de Estudios Avanzados del IPN, Av. Instituto Politécnico Nacional 2508, C.P. 07360 Mexico City, Mexico.

<sup>4</sup> Instituto de Investigaciones en Materiales, Universidad Nacional Autónoma de México, CDMX, 04510, México.

\* [mmartinezh@cua.uam.mx](mailto:mmartinezh@cua.uam.mx); (M. M.-H.)

### Electronic Supporting Information

#### Table of contents

1. Synthesis of azides **6** and **7**
2. Spectroscopy of all compounds
3. UV-vis analysis of compounds **21** - **24**

1. Synthesis of azides **6** and **7**

**Isopropylidene-2,2-bis(methoxy)propionic acid**, compound **2**. In a 250 mL round bottom flask equipped with a magnetic stirrer and conditioned with nitrogen atmosphere 15 g (111.8 mmol) of Bis-MPA and 0.42 g (3.02 mmol) of *p*-Toluensulfonic acid were dissolved in 75 mL of dry acetone and stirred at room temperature for 30 minutes. Then 17.4 g (20.5 mL, 167.1 mmol) of 2,2-dimethoxypropane was added and the reaction mixture was stirred at room temperature for 2 h. The reaction was quenched with K<sub>2</sub>CO<sub>3</sub> (1.7 g, 12.1 mmol). The solvent was removed by distillation and the residue was dissolved in 100 mL of DCM and washed with distilled water (3 x 50 mL). The product was obtained pure as a white solid in 90% yield (11.8 g, 73.8 mmol). <sup>1</sup>H-NMR (500 MHz, CDCl<sub>3</sub>, δ = ppm): 10.23 (Br, 1H, OH); 4.21 (d, J = 15.0 Hz, 2H); 3.69 (d, J = 15.0 Hz, 2H); 1.46 (s, 3H); 1.43 (s, 3H); 1.23 (s, 3H). <sup>13</sup>C-NMR (APT, 100 MHz, CDCl<sub>3</sub>, δ = ppm): 180.26 (C=O), 98.35 (O-C-O), 65.86, 41.76, 25.18, 22.00, 18.45. Characterization is in accordance with the literature. [Ref. 48 in main article].

**(2,2,5-trimethyl-1,3-dioxan-5yl)methanol**, compound **4**. In a 250 mL round bottom flask equipped with a magnetic stirrer and conditioned with nitrogen atmosphere 10 g (82 mmol) of 2-(hydroxymethyl)-2-methylpropane-1,3-diol and 0.1 g (0.52 mmol) of *p*-Toluensulfonic acid were dissolved in 75 mL of dry acetone and stirred at room temperature for 1 h. Then 12.88 g (15.4 mL, 123.7 mmol) of 2,2-dimethoxypropane was added and the reaction mixture was stirred at room temperature for 4 h. The reaction was quenched with K<sub>2</sub>CO<sub>3</sub> (0.4 g, 2.9 mmol). The solvent was removed by distillation and the residue was dissolved in 100 mL of DCM and washed with distilled water (3 x 50 mL). The product was obtained pure as a clear oil in 92% yield (12.1 g, 75.4 mmol). <sup>1</sup>H-

**NMR (400 MHz, CDCl<sub>3</sub>,  $\delta$  = ppm):** 3.70 (s, 2H); 3.69 (d,  $J$  = 11.9 Hz, 2H); 3.62 (d,  $J$  = 11.9 Hz, 2H); 2.21 (br, 1H); 1.45 (s, 3H); 1.40 (s, 3H); 0.84 (s, 3H). **<sup>13</sup>C-NMR (APT, 100 MHz, CDCl<sub>3</sub>,  $\delta$  = ppm):** 17.58 (CH<sub>3</sub>), 20.15 (CH<sub>3</sub>), 27.28 (CH<sub>3</sub>), 34.74 (C), 65.97 (CH<sub>2</sub>), 66.35 (CH<sub>2</sub>), 97.97 (O-C-O). **FT-IR-ATR (cm<sup>-1</sup>):** 3418.4, 2990.6, 2939.0, 2868.5, 1453.1, 1370.6, 1265.5, 1205.7, 1151.4, 1082.5, 1035.4, 932.9, 909.9, 826.6, 730.8, 520.4. Characterization is in accordance with the literature. [Ref. 48 in main article].

**Tosylate 5.** In a 50 mL round bottom flask, 2.0 g (12.5 mmol) of cetonide **4** was mixed with 6 mL of pyridine, then a solution of p-toluenesulfonyl chloride (2.38 g, 12.54 mmol) in 3 mL of pyridine was added. The reaction mixture was stirred at 100° C for 2 h. Reaction was poured into ice-water (200 mL) and extracted with Et<sub>2</sub>O (3 X 75 mL). The organic layers were mixed and dried with anhydrous Na<sub>2</sub>SO<sub>4</sub> and the solvent was removed by vacuum distillation. Product was purified by column chromatography Hex-EtOAc (100:0 to 7:3) to obtain 2.94 g of pure product as a wax white solid, 75 % yield. **MS-ES-EPI (M + H, low resolution):** found = 315.1 (calculated: 315.1266), (M + Na) found = 337.1 (calculated: 337.1086)

**5-(azidomethyl)-2,2,5-trimethyl-1,3-dioxane**, compound **6**. In a 50 mL round bottom flask, 2.5 g (7.99 mmol) of tosylate **5** was dissolved in 30 mL of DMF-H<sub>2</sub>O (8:1) and sodium azide was added (0.57 g, 8.79 mmol). Reaction mixture was stirred at 110° C for 16 h, until no starting material was observed by TLC. The mixture was poured into 100 mL of water and extracted with Et<sub>2</sub>O (3 x 75 mL). solvent was removed by distillation and the product was purified by column chromatography on silica gel with Hexane-EtOAc (95:5) as eluent, obtaining 1.33 g (7.2 mmol, 57.6%) of pure product as a clear oil. **<sup>1</sup>H-NMR (400 MHz, CDCl<sub>3</sub>,  $\delta$  = ppm):** 3.63 (d,  $J$  = 12.8 Hz, 2H); 3.60 (d,  $J$  = 12.8 Hz, 2H); 3.54 (s, 2H); 1.45 (s, 3H); 1.42 (s, 3H); 0.84 (s, 3H). **<sup>13</sup>C-NMR (APT, 100 MHz, CDCl<sub>3</sub>,  $\delta$  = ppm):** 18.04 (CH<sub>3</sub>), 19.65 (CH<sub>3</sub>), 27.70 (CH<sub>3</sub>), 34.43 (C), 55.99 (CH<sub>2</sub>), 66.68 (CH<sub>2</sub>). **FT-IR ATR (cm<sup>-1</sup>):** 2095.4 (N<sub>3</sub>) Characterization is in accordance with the reported literature. [Ref. 48 in main article].

**2-(azidomethyl)-2-methylpropane-1,3-diylbis(2,2,5-trimethyl-1,3-dioxane-5-carboxylate)**, compound **7**. To a solution of 1.2 g (6.48 mmol) of azide **6** in 30 mL of MeOH, 0.1 g of DOWEX-H + resin was added. This mixture was stirred at 40° C for 45 minutes, then it was filtered through a glass porous funnel. The solvent was removed by vacuum distillation and the resulting diol (0.937 g, 6.46 mmol, 99%) was dissolved in 25 mL of dry CH<sub>2</sub>Cl<sub>2</sub> and conditioned under nitrogen. To this mixture, 2.36 g (13.57 mmol) of acid **2**, 1.33 g (4.52 mmol) of DPTS and 0.16 g (1.3 mmol) of DMAP were added. The reaction mixture was stirred at 0° C for 40 minutes, then a solution of 2.93 g (14.21 mmol) of DCC in dry DCM was added dropwise. The reaction was allowed to reach room temperature and stirred for 48 h. The white precipitate (DCU) was removed by filtration and the solvent removed by vacuum distillation. The residue containing the desired product mixed with DPTS was dissolved in hot EtOAc to remove the DPTS by crystallization. This process was repeated 2 or 3 times before the final purification by column chromatography on silica gel (Hex-EtOAc, 9:1 to 7:3). The product was obtained as a clear oil, 2.54 g (5.56 mmol, 86%). **<sup>1</sup>H-NMR (400 MHz, CDCl<sub>3</sub>,  $\delta$  = ppm):** 4.20 (d,  $J$  = 12.0 Hz, 4H); 4.10 (s, 4H); 3.67 (d,  $J$  = 12.0 Hz, 4H); 3.40 (s, 2H); 1.45 (s, 6H); 1.38 (s, 6H); 1.16 (2, 6H); 1.07 (s, 3H). **<sup>13</sup>C-NMR (APT, 100 MHz, CDCl<sub>3</sub>,  $\delta$  = ppm):** 17.69 (CH<sub>3</sub>), 18.47 (CH<sub>3</sub>), 21.53 (CH<sub>3</sub>), 25.75 (CH<sub>3</sub>), 40.03 (C), 42.24 (C), 55.15 (CH<sub>2</sub>), 65.96 (CH<sub>2</sub>), 66.14 (CH<sub>2</sub>), 98.18 (O-C-O), 173.78 (C=O). **FT-IR-ATR (cm<sup>-1</sup>):** 2939.8, 2875.7, 2102.5, 1732.2, 1197.9, 1151.2, 1120.9, 1077.9, 1039.7, 934.4, 828.7, 519.8. **FT-IR ATR (cm<sup>-1</sup>):** 2104.3 (N<sub>3</sub>), 1734.7 (C=O). **MS-ES-EPI (M + H, low resolution):** found = 458.3 (calculated: 458.2502), (M + Na) found = 480.3 (calculated: 480.5077).

## 2. Spectroscopic Data of all compounds

### $^1\text{H}$ - NMR of compound **2**

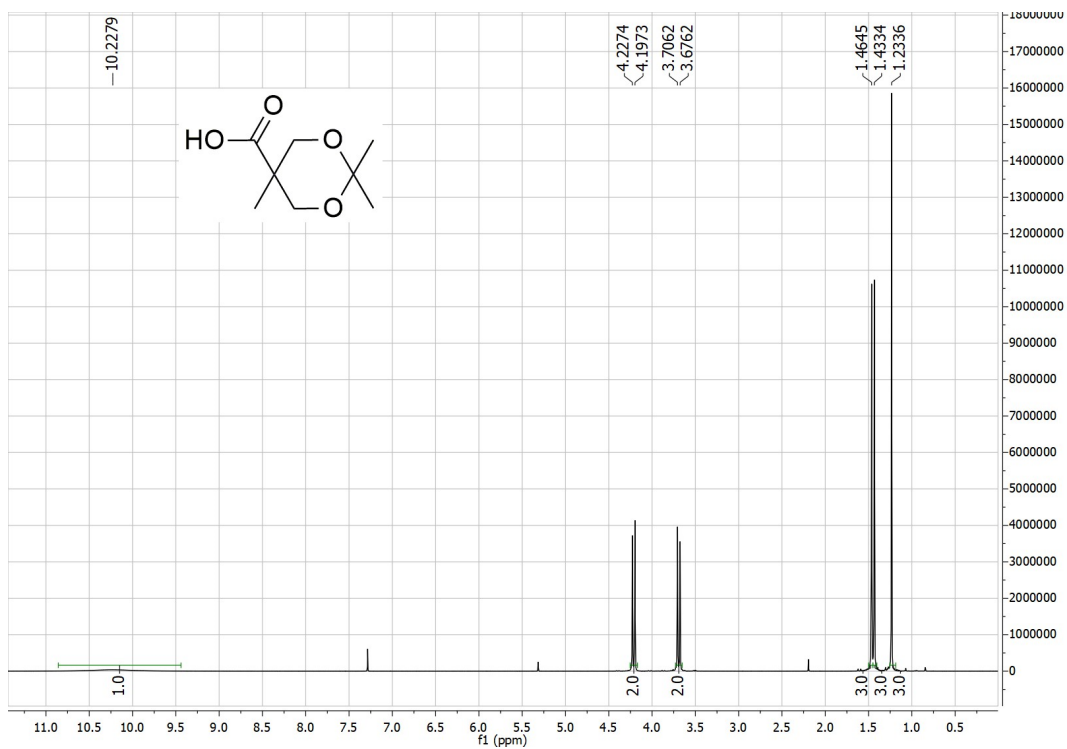

### $^{13}\text{C}$ - NMR of compound **2**

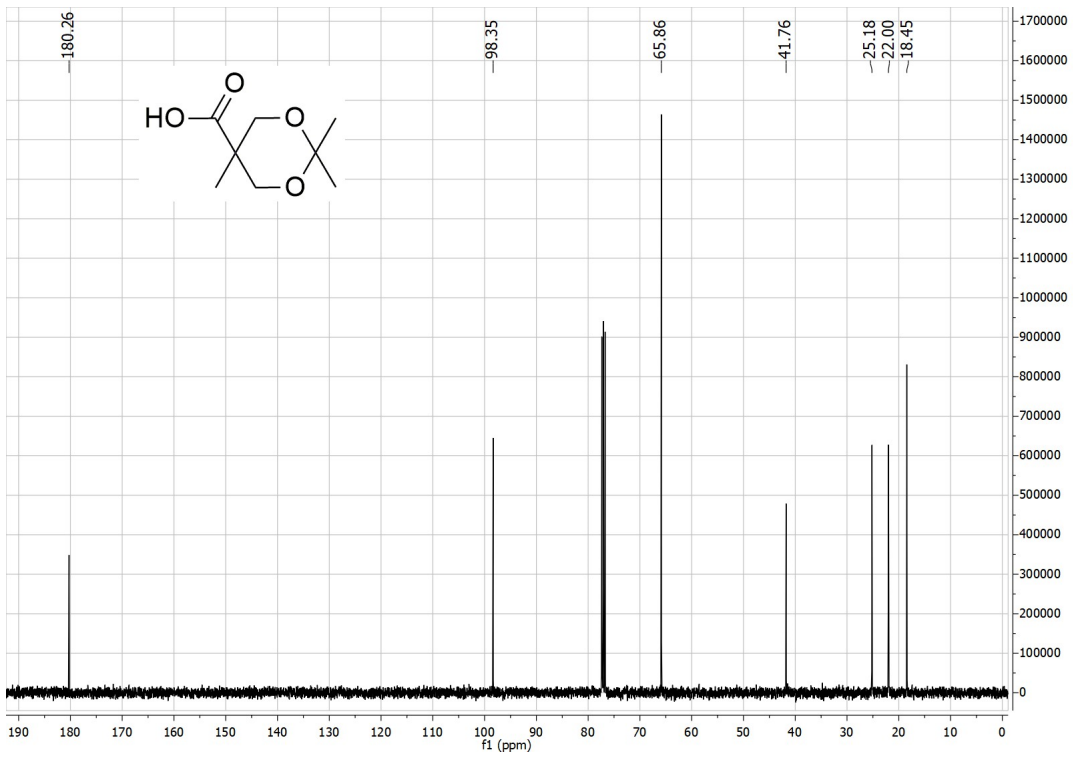

**<sup>1</sup>H-NMR of compound 4**

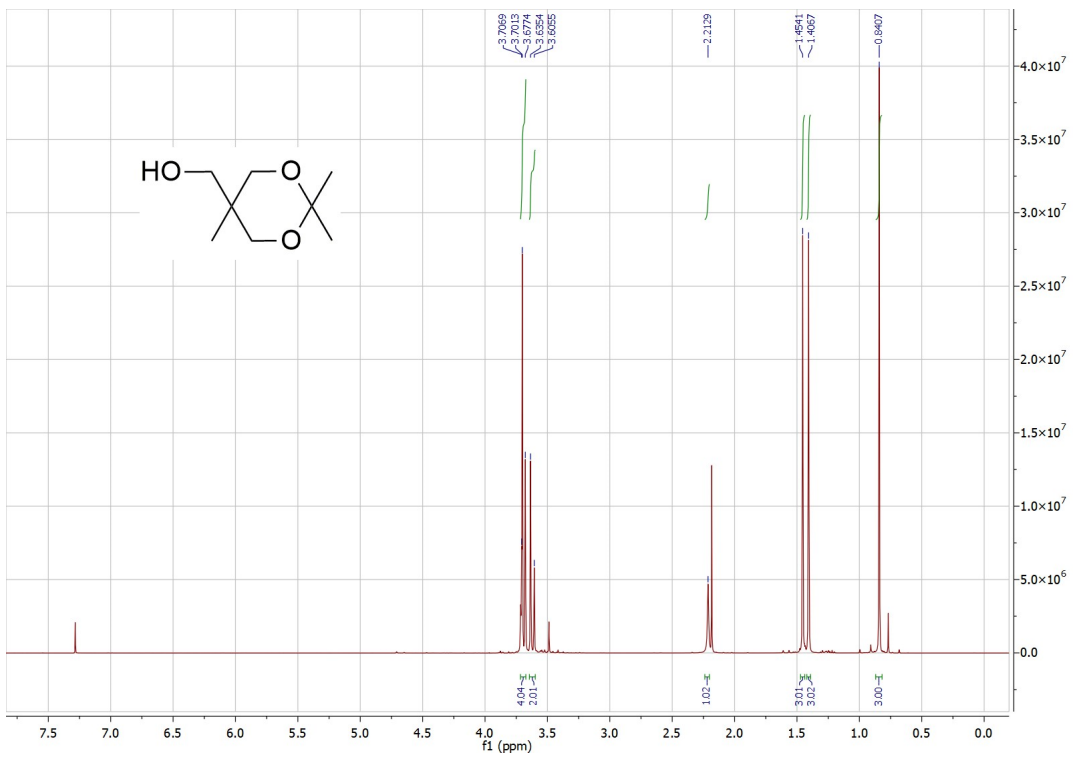

**<sup>13</sup>C-NMR of compound 4**

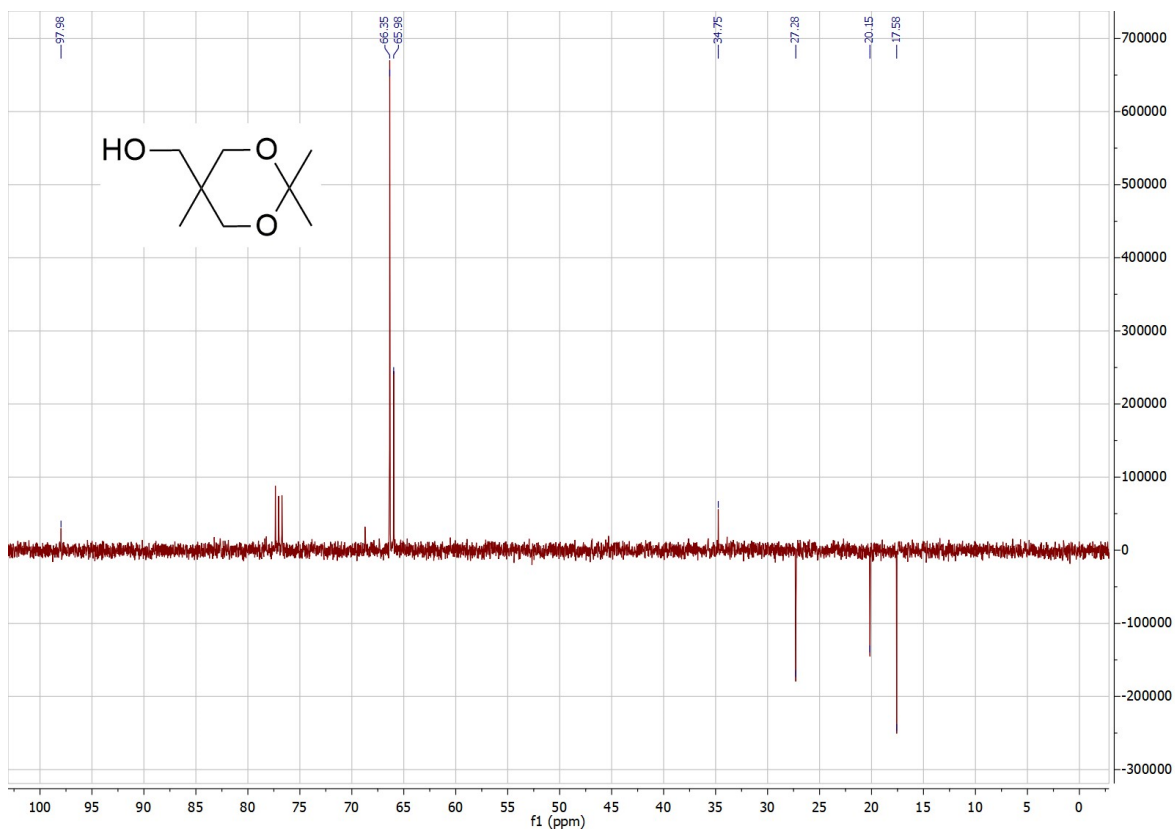

**<sup>1</sup>H-NMR of compound 5**

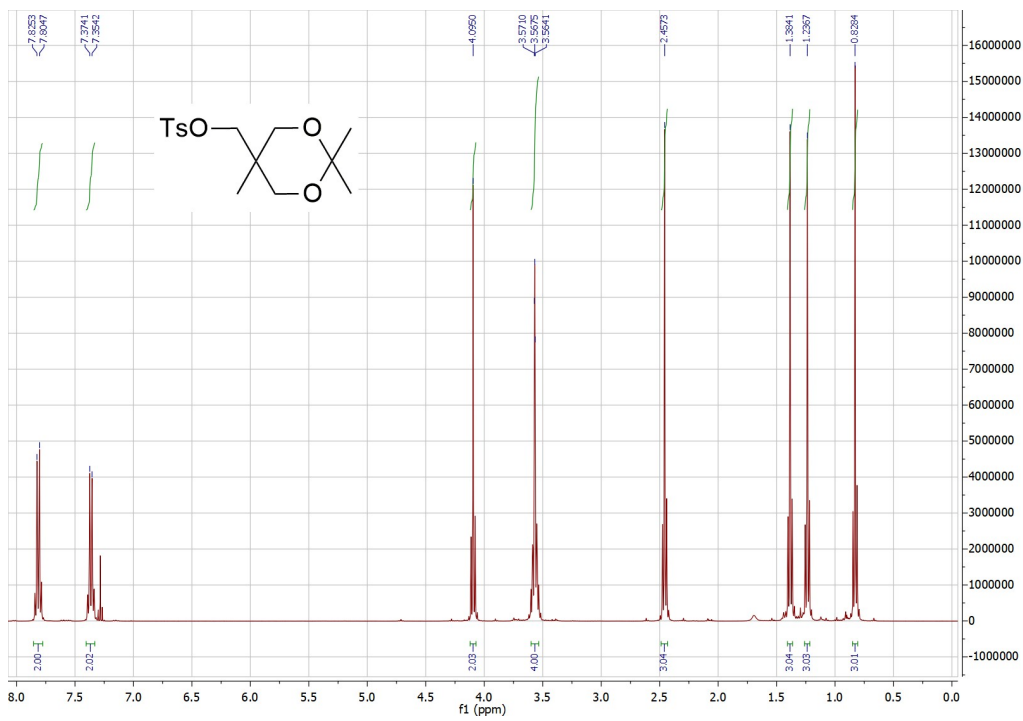

**<sup>13</sup>C-NMR of compound 5**

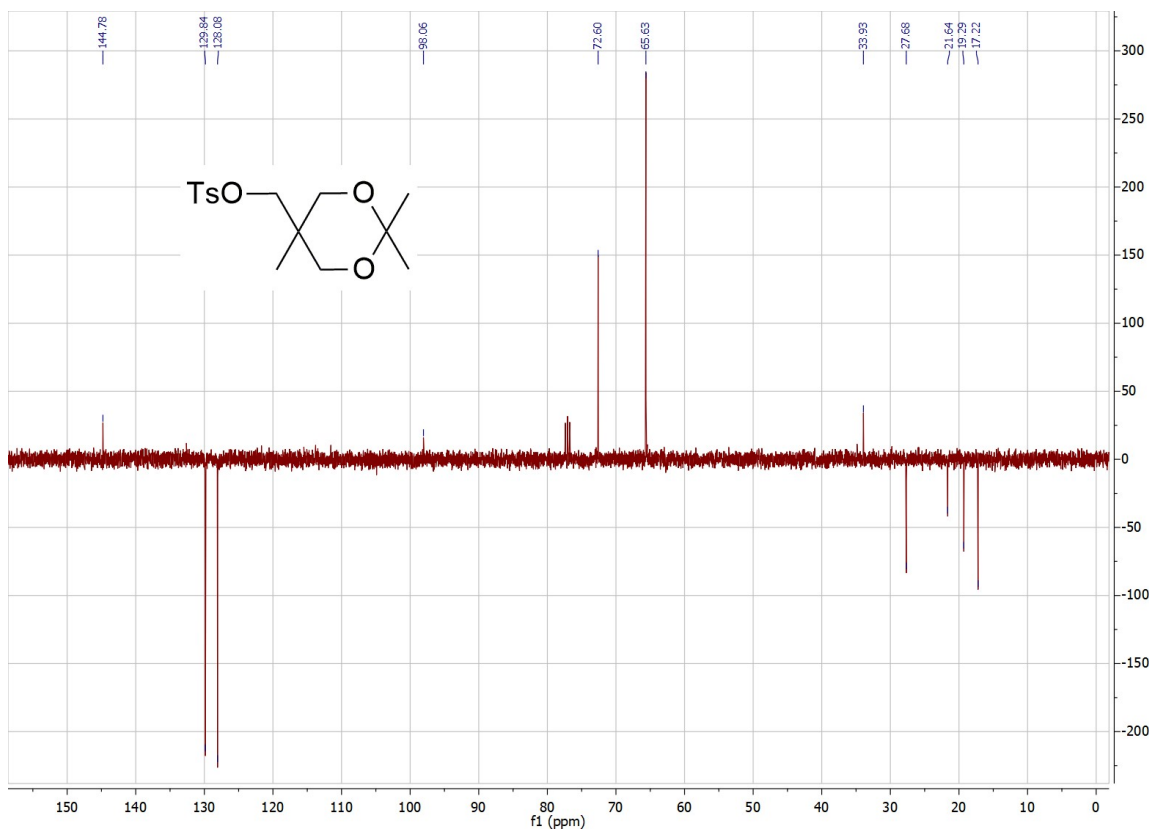

**<sup>1</sup>H-NMR of compound 6**

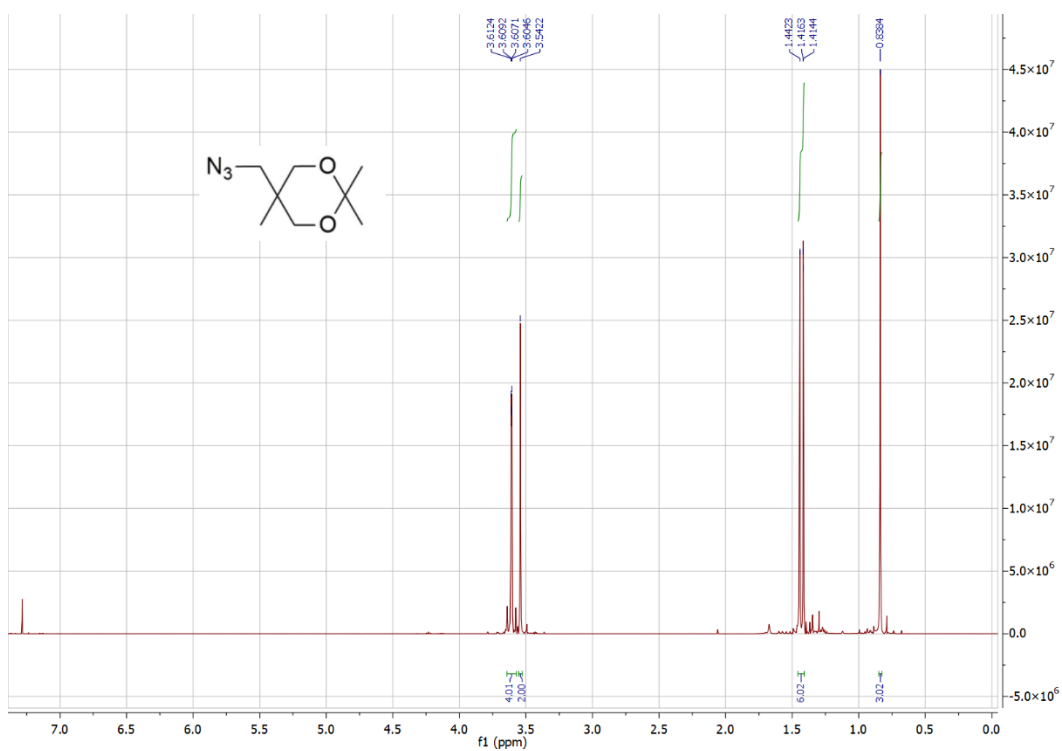

### <sup>13</sup>C- NMR of compound 6

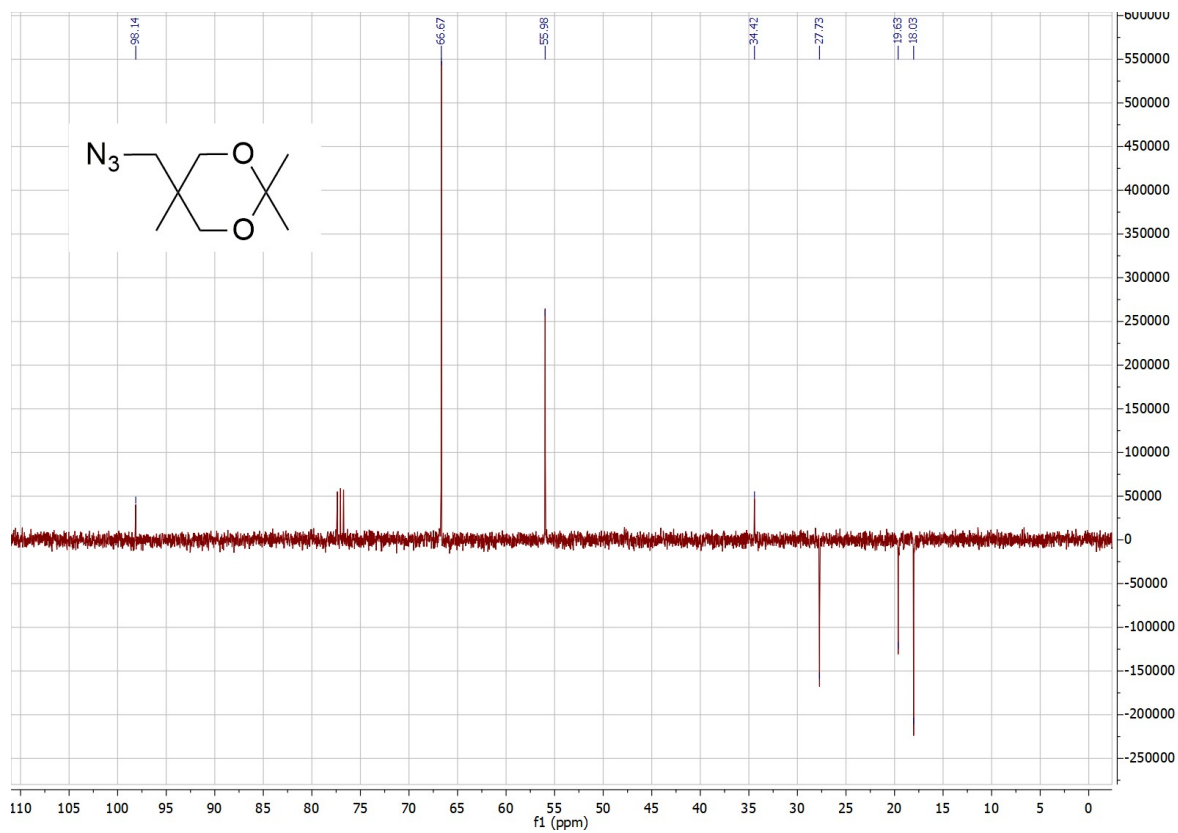

### FT-IR of compound 6

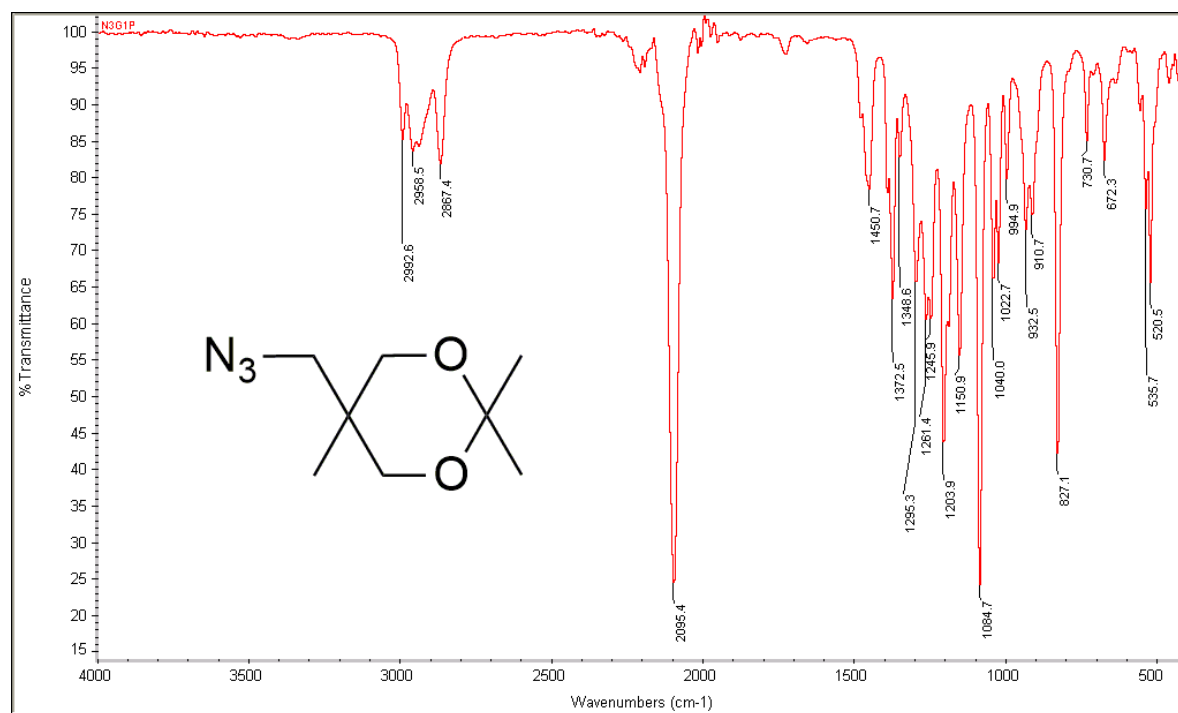

### <sup>1</sup>H- NMR of compound 6'

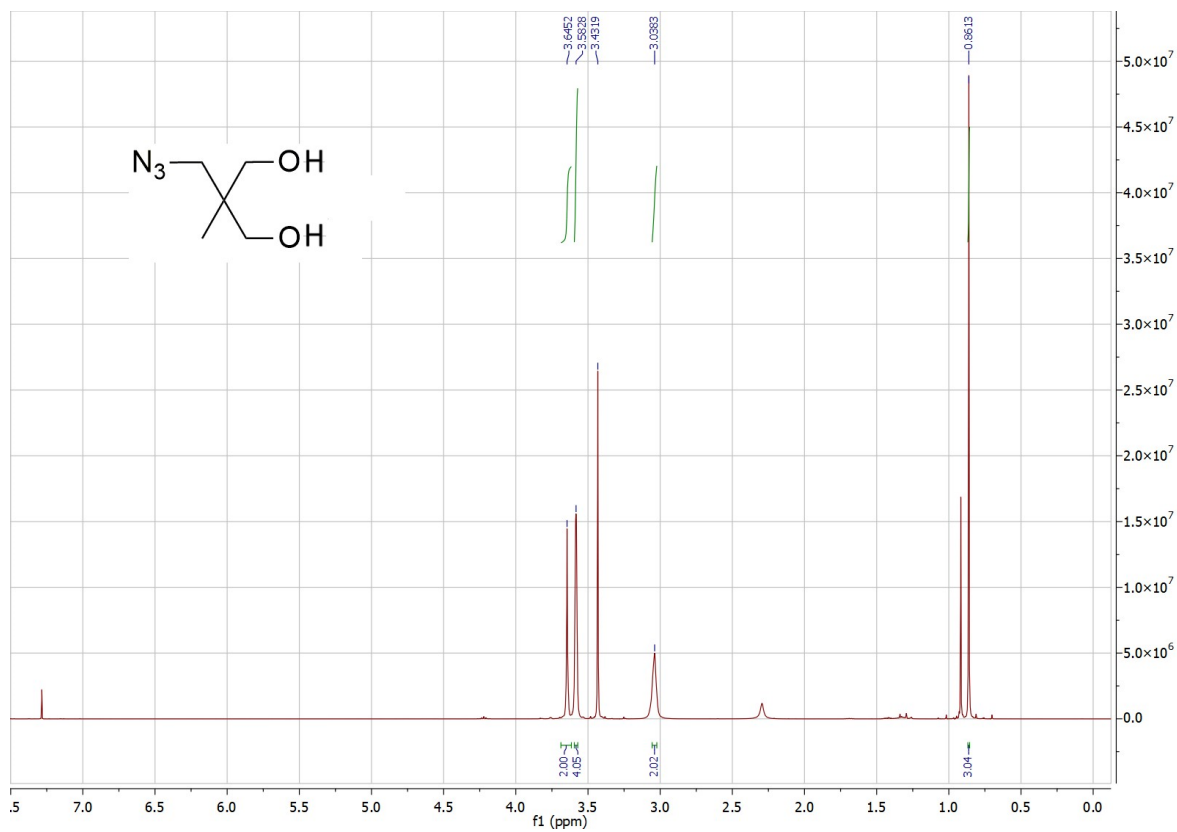

$^{13}\text{C}$ - NMR of compound **6'**



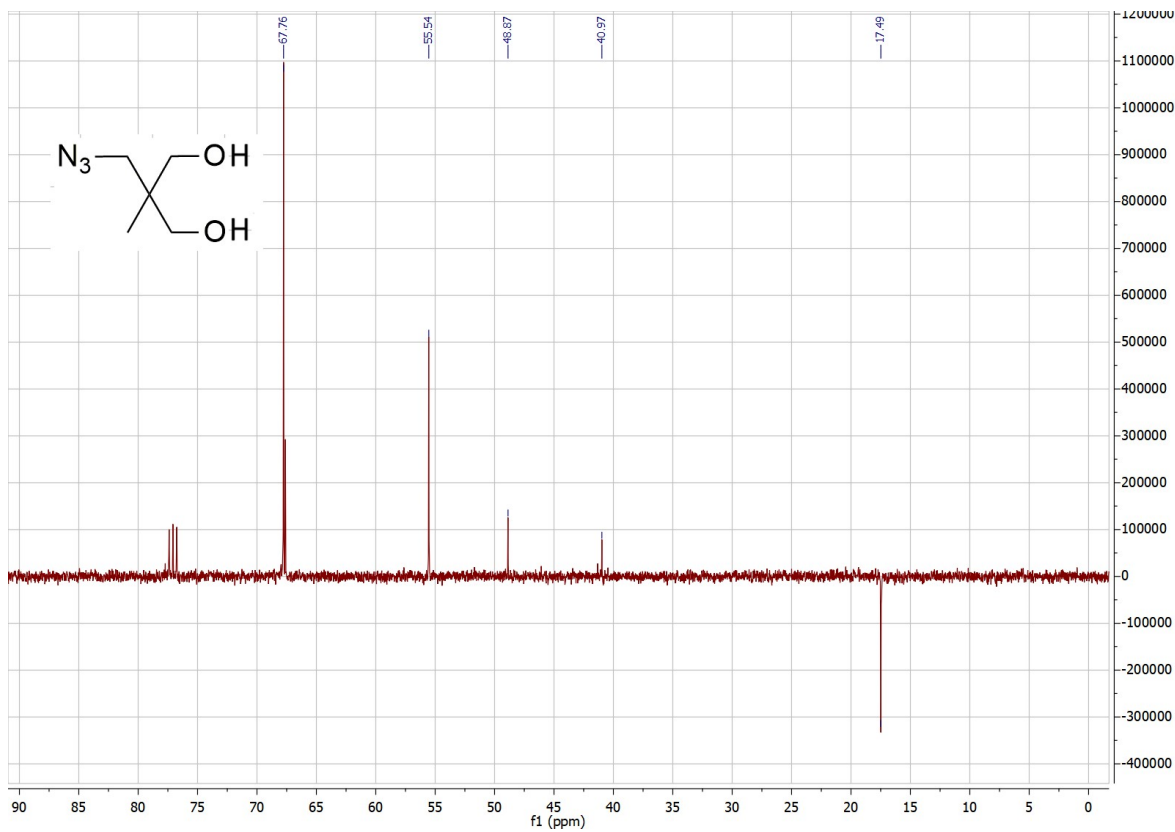

**<sup>1</sup>H-NMR of compound 7**

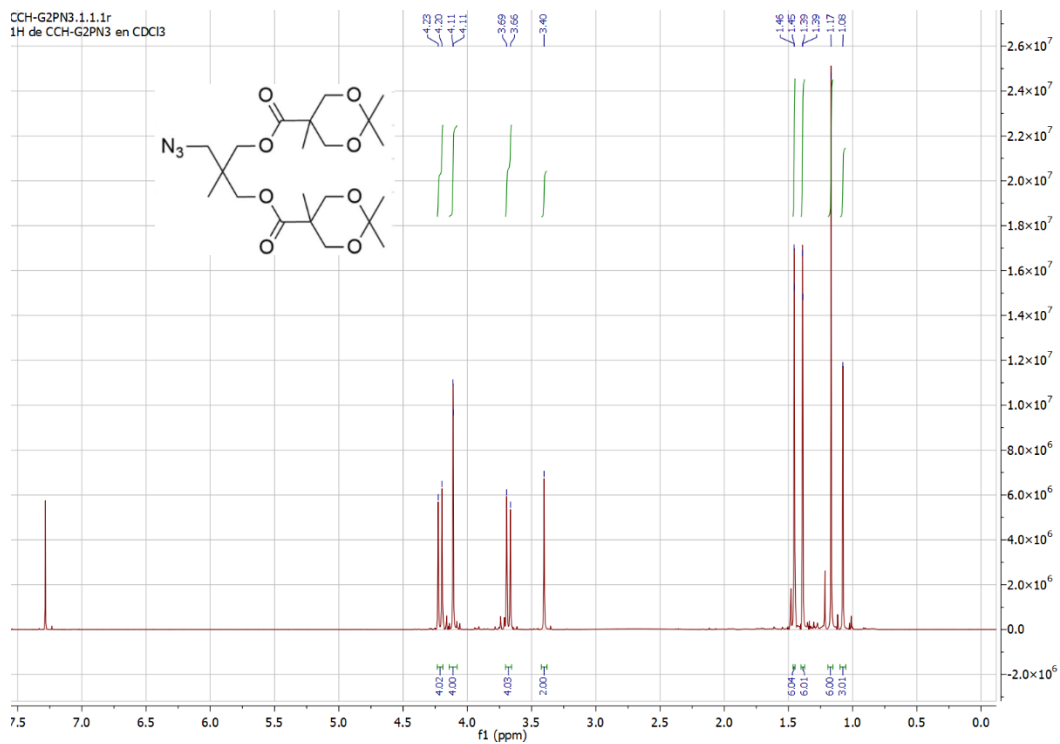

**<sup>13</sup>C-NMR of compound 7**



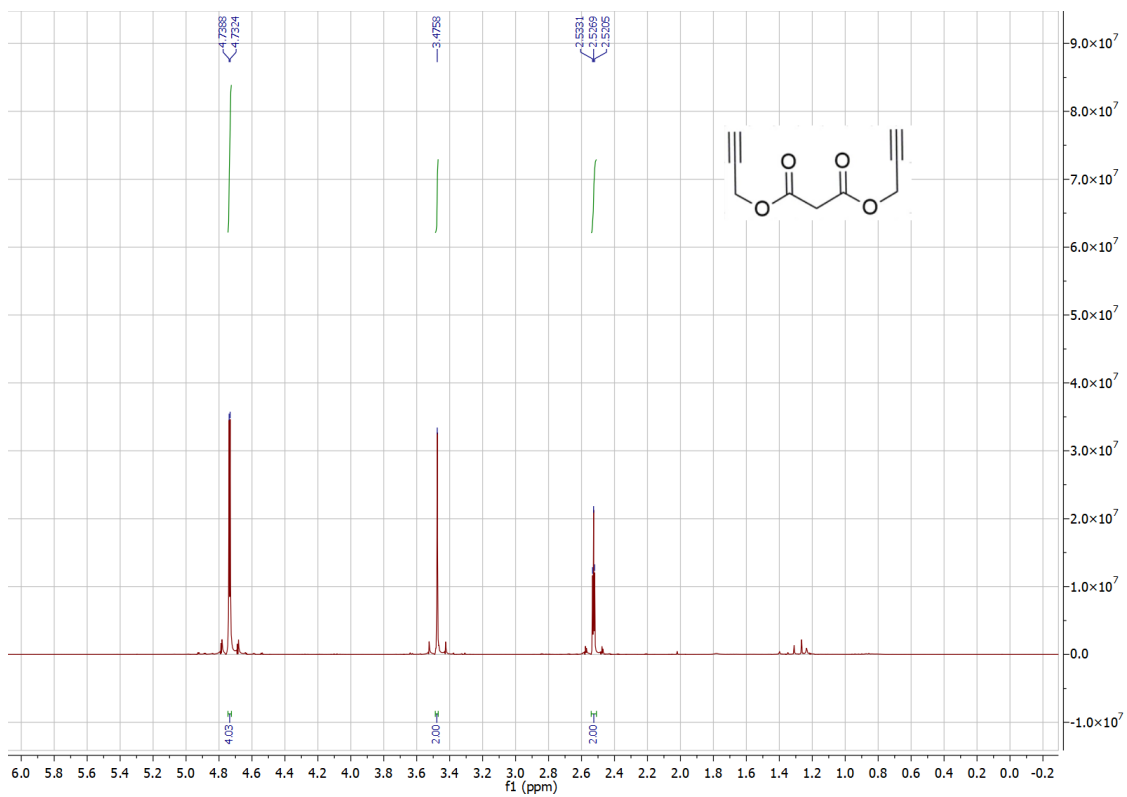

**<sup>13</sup>C- NMR of compound 9**

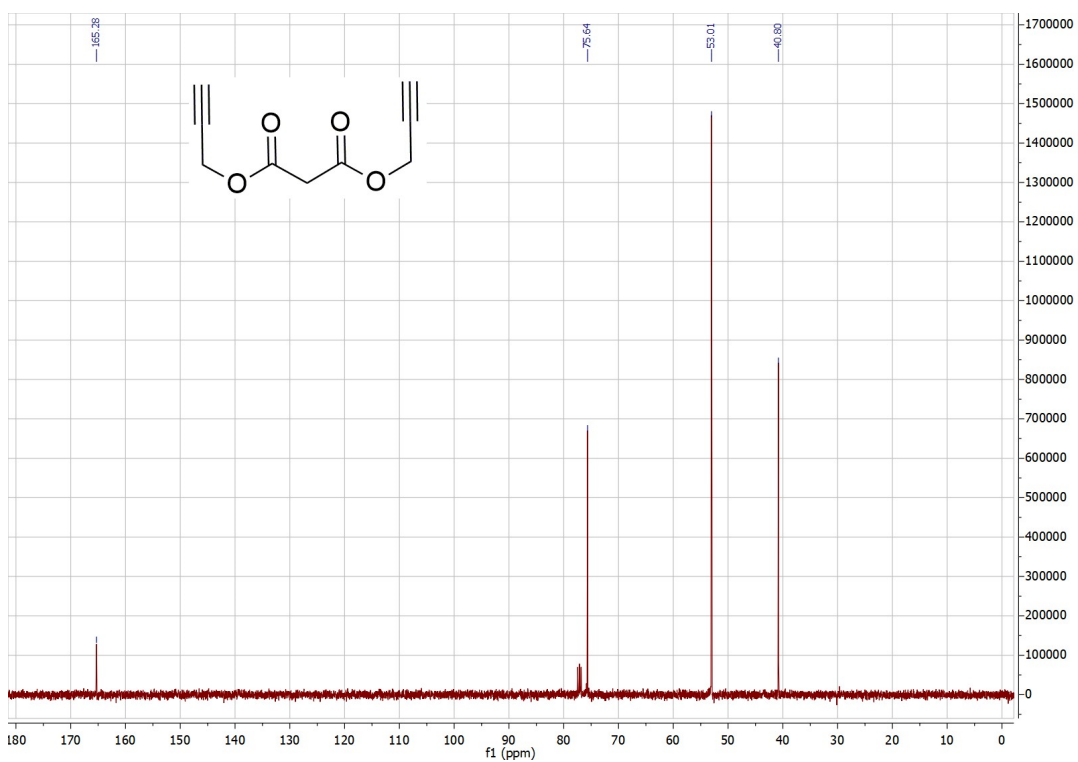

**FT-IR of compound 9**

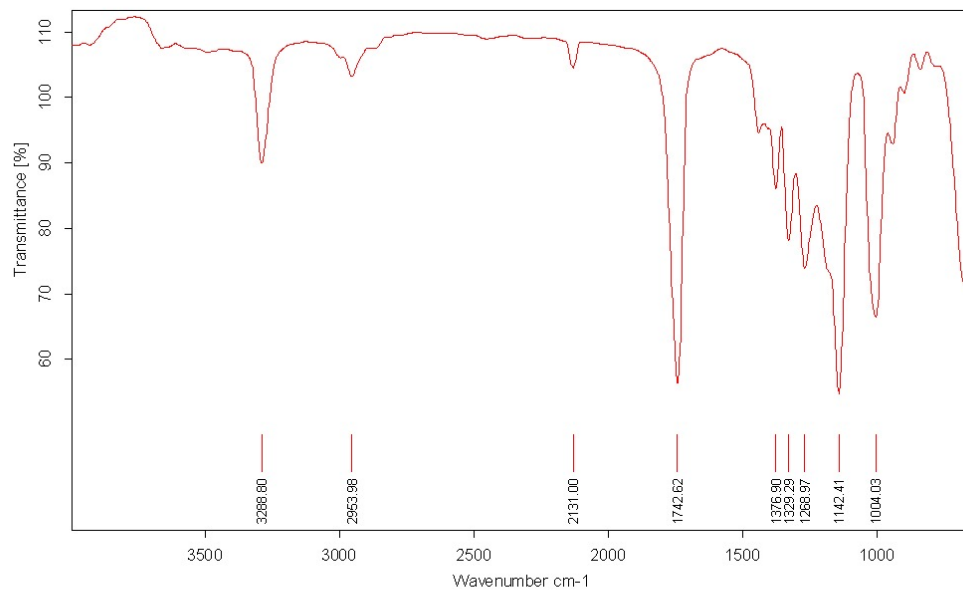

C:\PROGRAM FILES\OPUS\MEAS\MELCHOR MARTINEZ H\PROPARGILMALONATE.0 PROPARGILMALONATE Instrument type and / or 04/09/2023

<sup>1</sup>H- NMR of compound 10

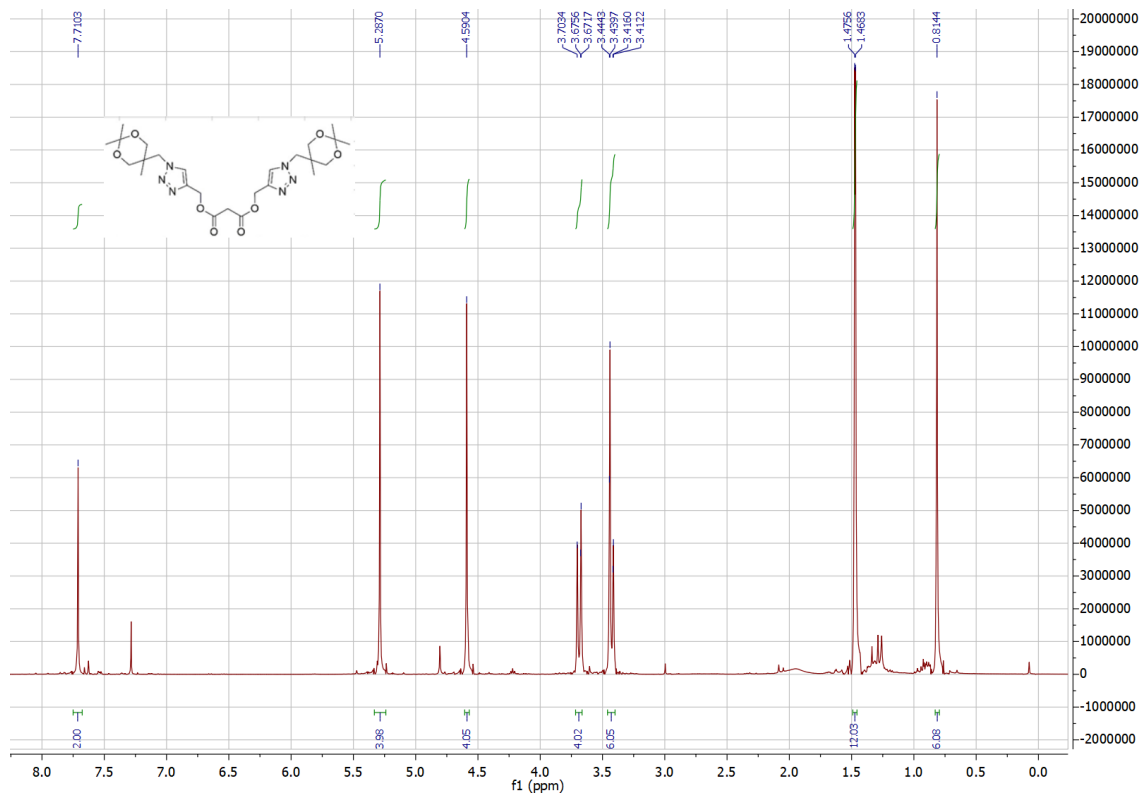

<sup>13</sup>C- NMR of compound 10

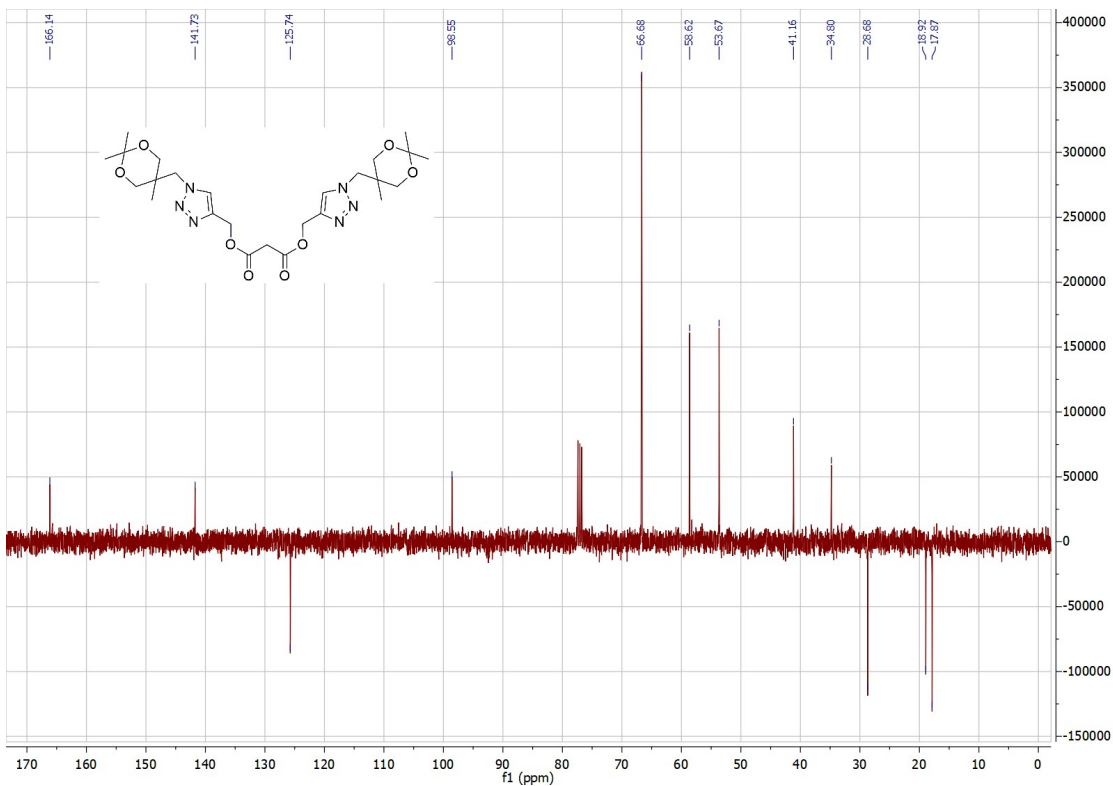

FT-IR of compound 10

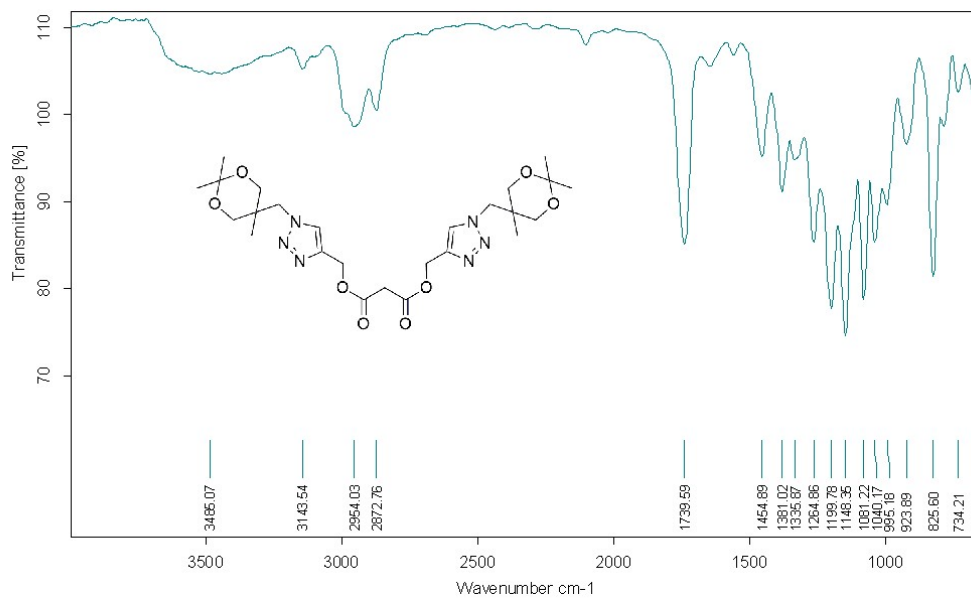

|                                     |        |                                    |            |
|-------------------------------------|--------|------------------------------------|------------|
| C:\Program Files\OPUS\meas\METG1P.0 | METG1P | Instrument type and / or accessory | 23/08/2023 |
|-------------------------------------|--------|------------------------------------|------------|

<sup>1</sup>H- NMR of compound 11

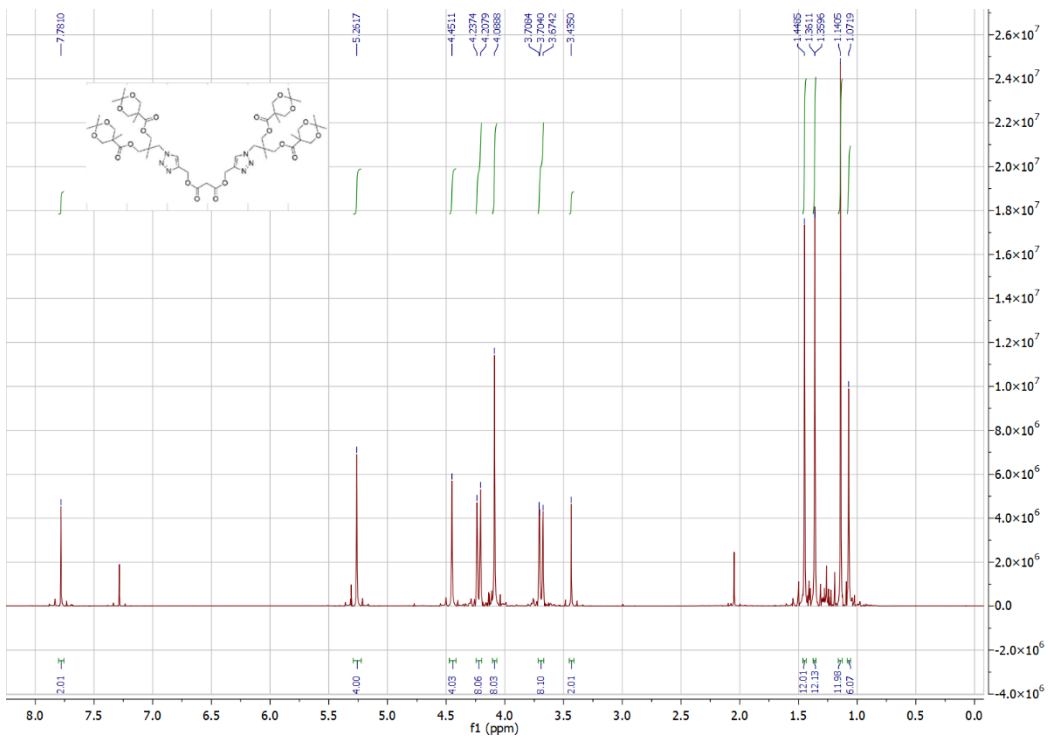

**<sup>13</sup>C- NMR of compound 11**

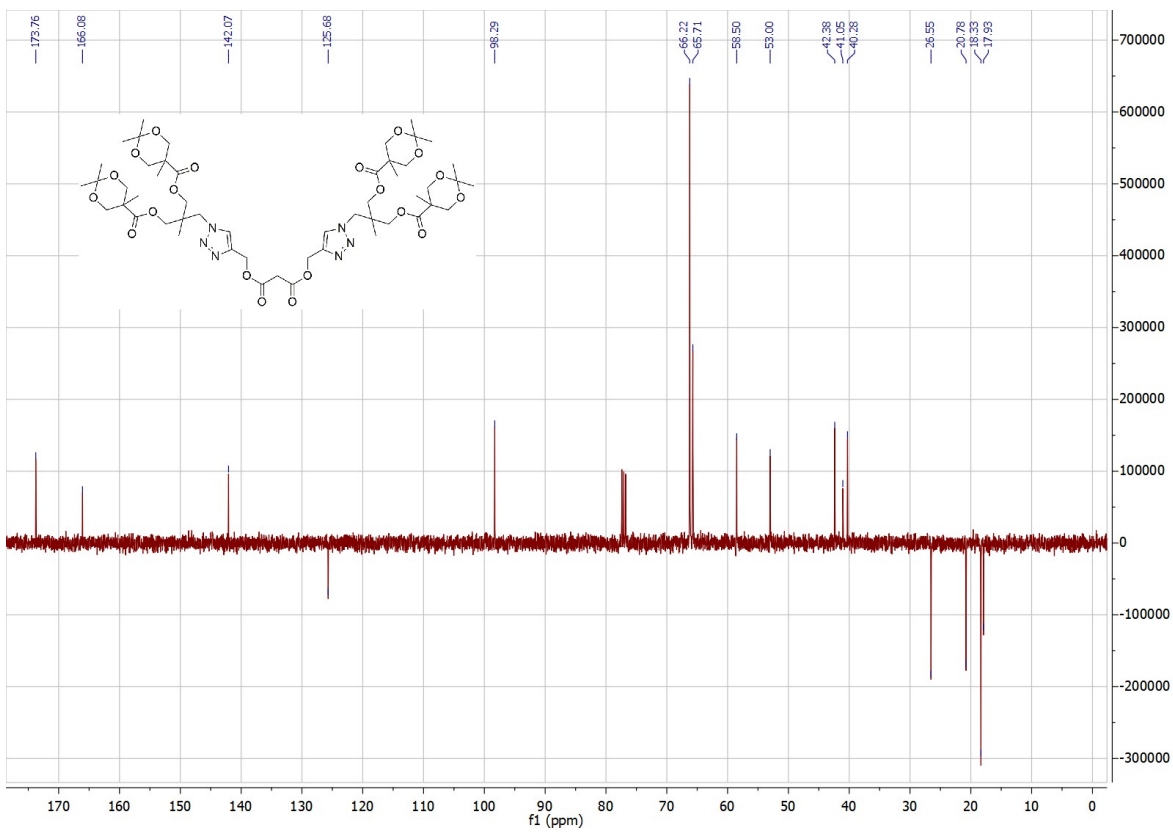

**FT-IR of compound 11**

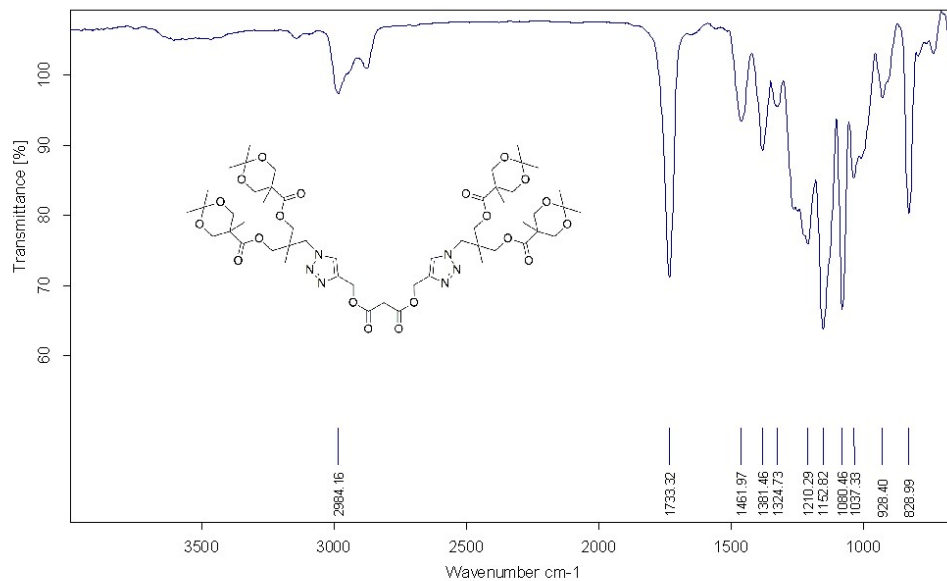

C:\Program Files\OPUS\meas\METG2P.0    METG2P    Instrument type and / or accessory    23/08/2023

<sup>1</sup>H- NMR of compound 13

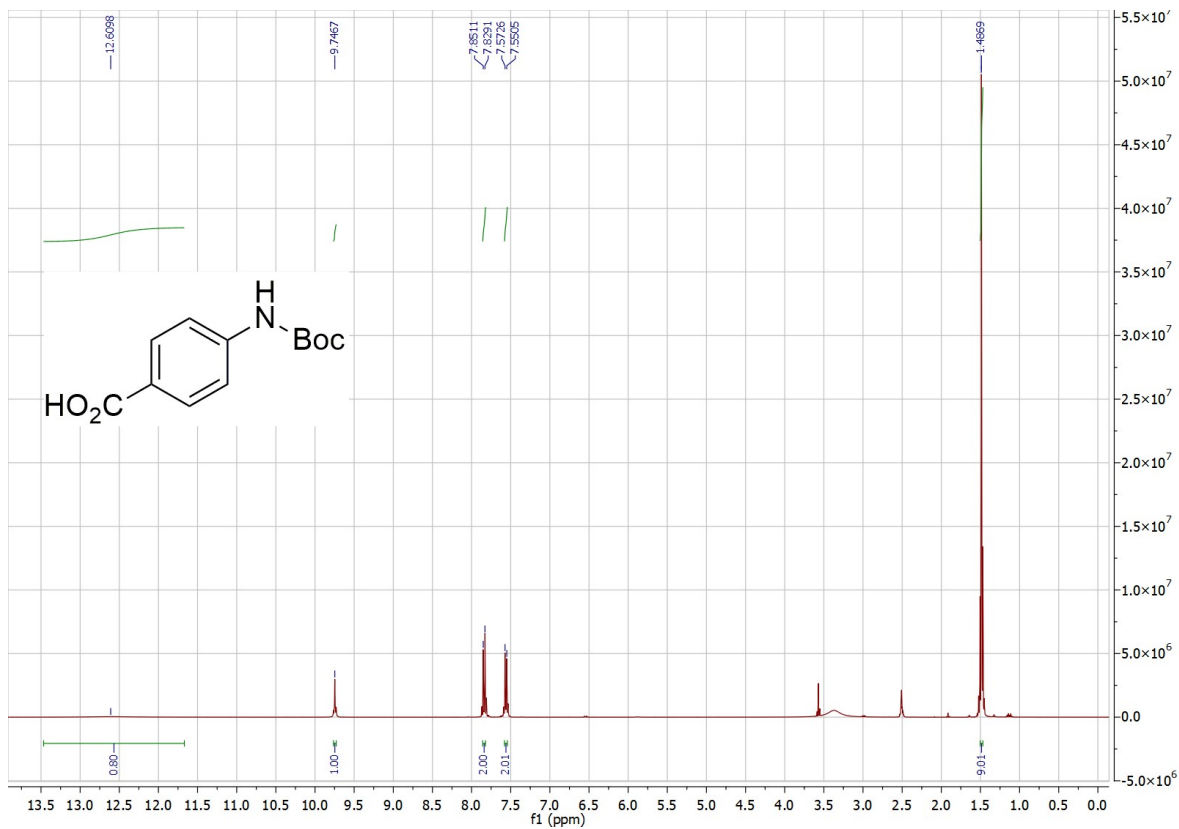

<sup>13</sup>C- NMR of compound 13

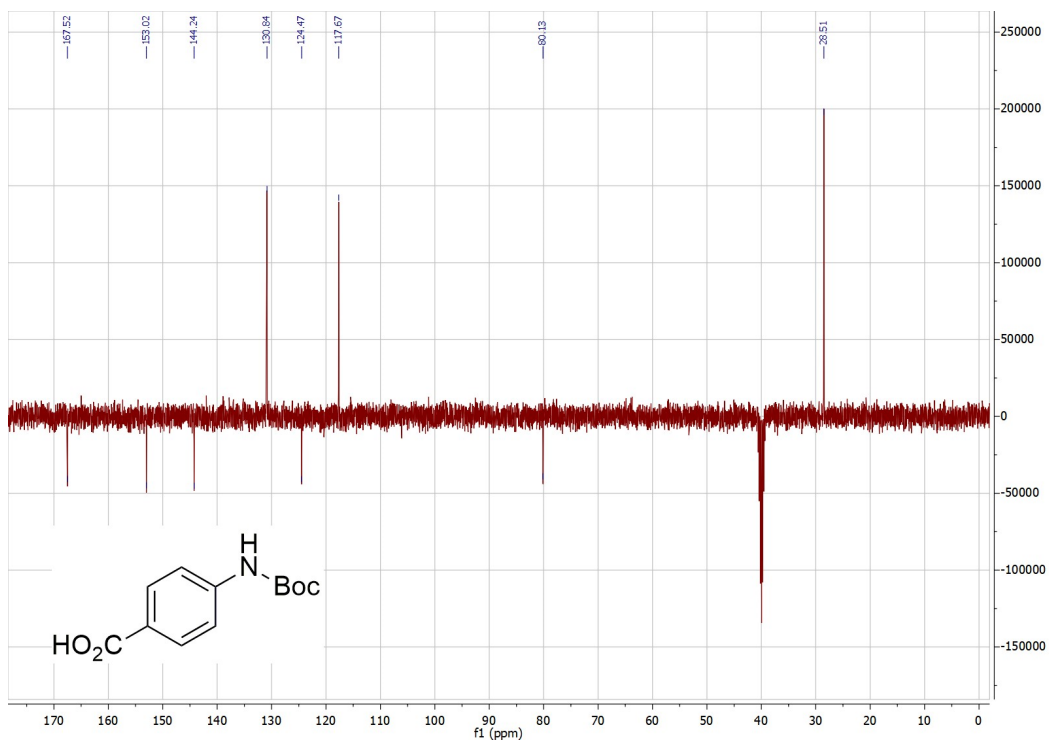

FT-IR of compound 13

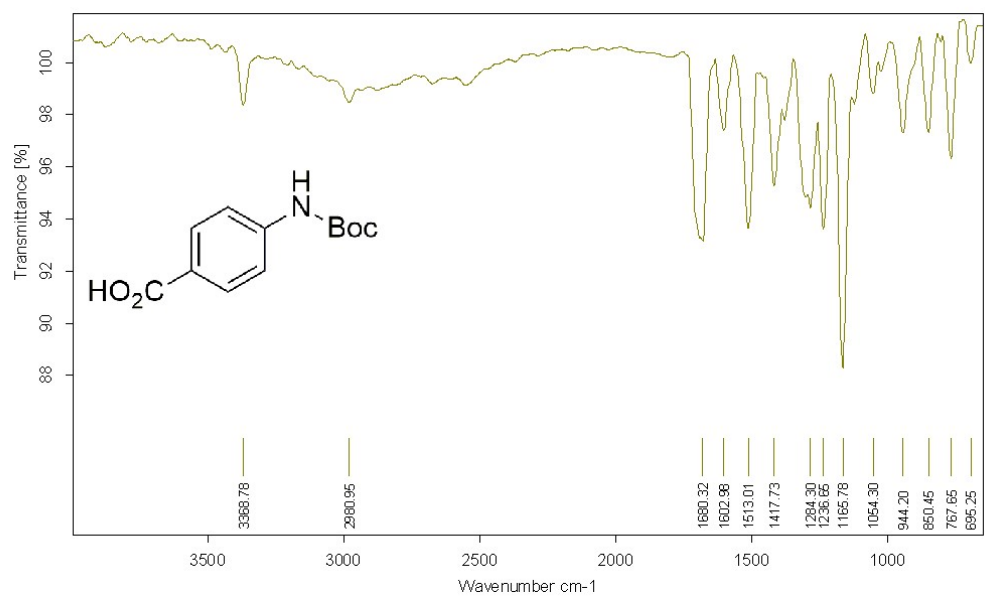

|                                      |         |                                    |            |
|--------------------------------------|---------|------------------------------------|------------|
| C:\Program Files\OPUS\meas\PABABOC.D | PABABOC | Instrument type and / or accessory | 23/08/2023 |
|--------------------------------------|---------|------------------------------------|------------|

<sup>1</sup>H- NMR of compound 14



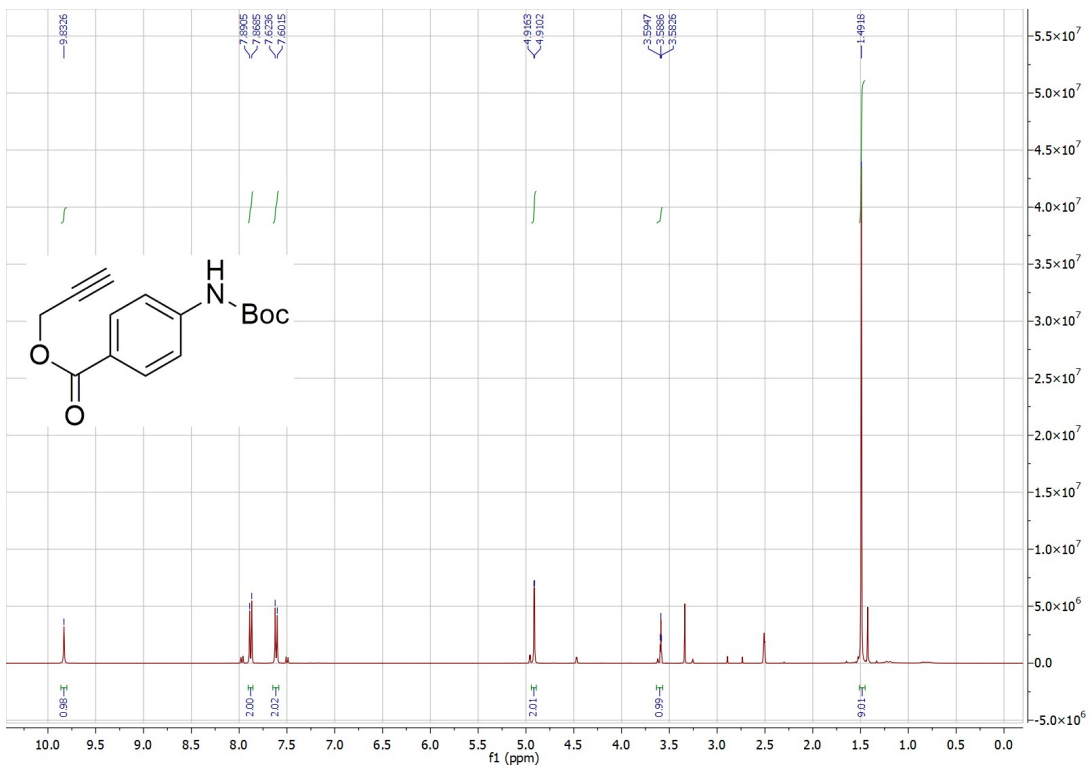

**<sup>13</sup>C- NMR of compound 14**

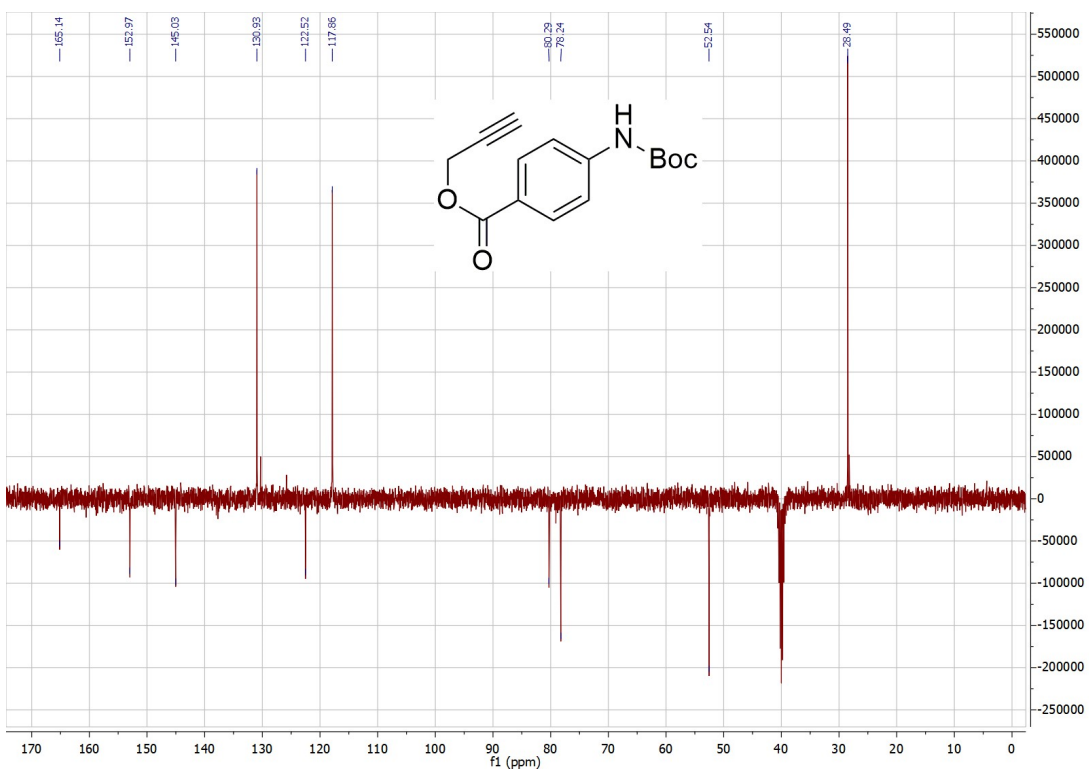

**FT-IR of compound 14**

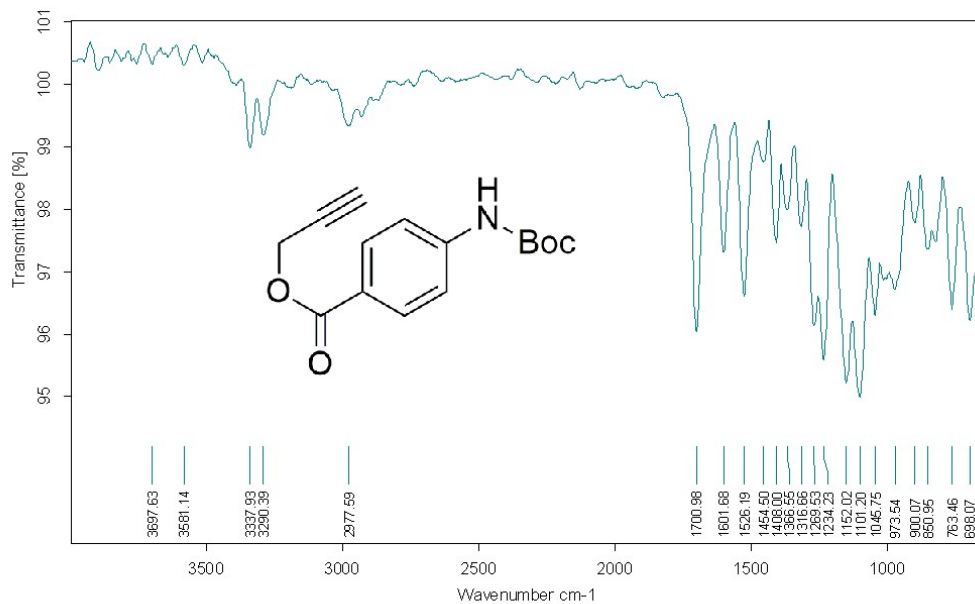

|                                         |            |                                    |            |
|-----------------------------------------|------------|------------------------------------|------------|
| C:\Program Files\OPUS\meas\BOCPABAINO.D | BOCPABAINO | Instrument type and / or accessory | 23/08/2023 |
|-----------------------------------------|------------|------------------------------------|------------|

Page 1 of 1

### <sup>1</sup>H- NMR of compound 15

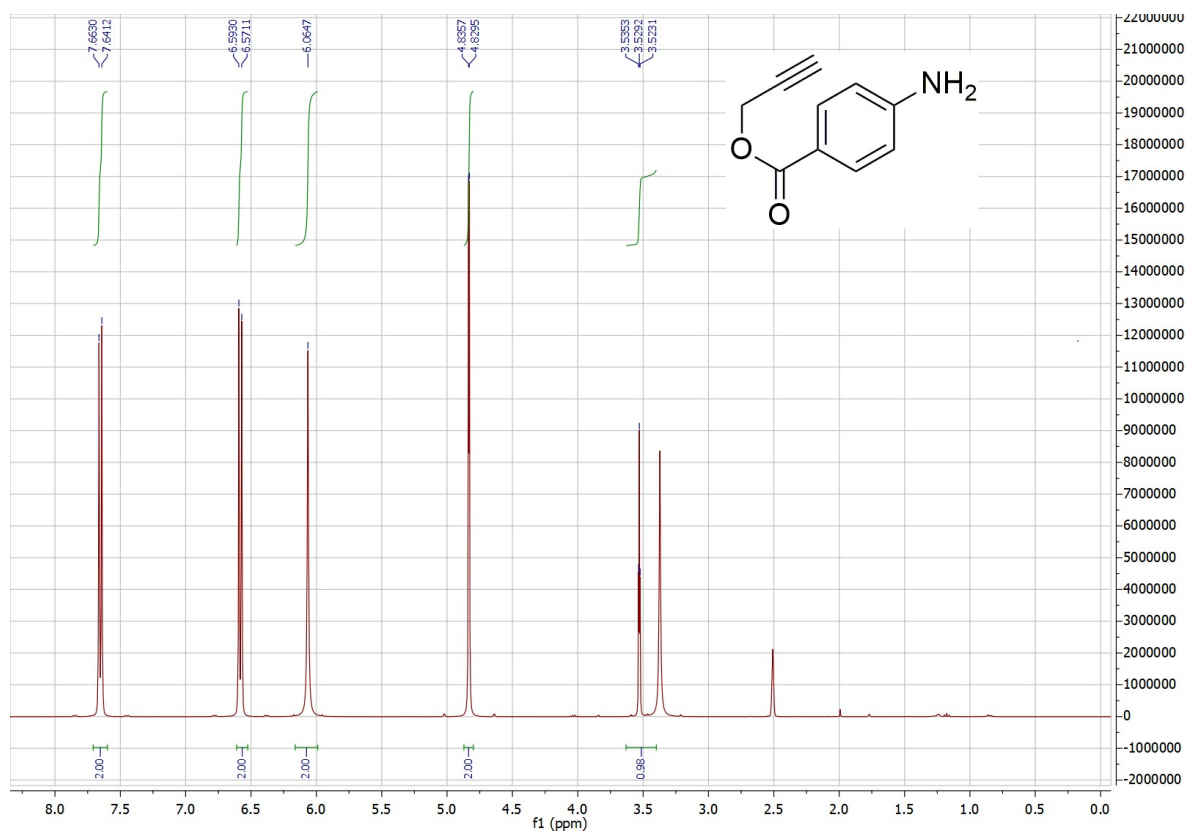

### <sup>13</sup>C- NMR of compound 15

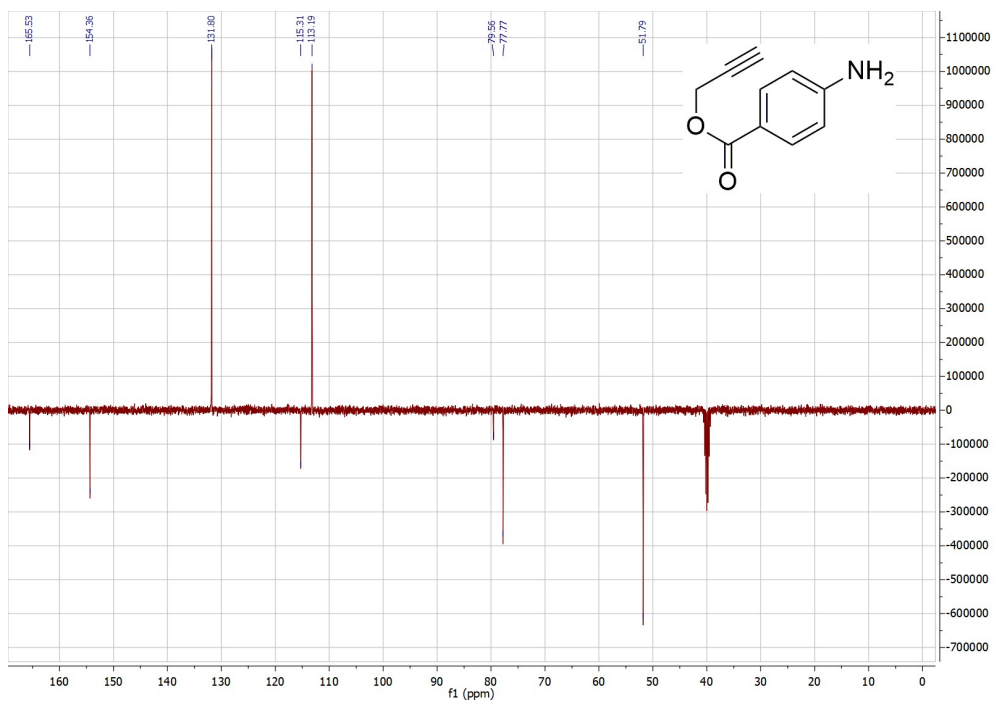

FT-IR of compound 15

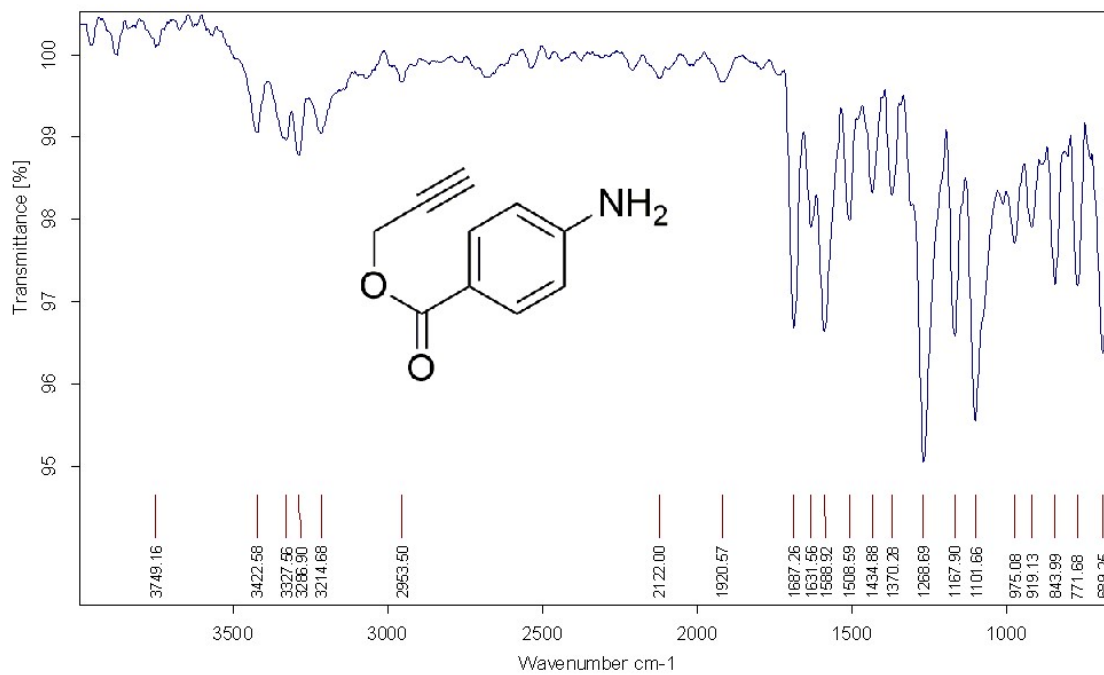

|                                      |         |                                    |            |
|--------------------------------------|---------|------------------------------------|------------|
| C:\Program Files\OPUS\meas\PABAINO.0 | PABAINO | Instrument type and / or accessory | 23/08/2023 |
|--------------------------------------|---------|------------------------------------|------------|

<sup>1</sup>H-NMR of compound 16

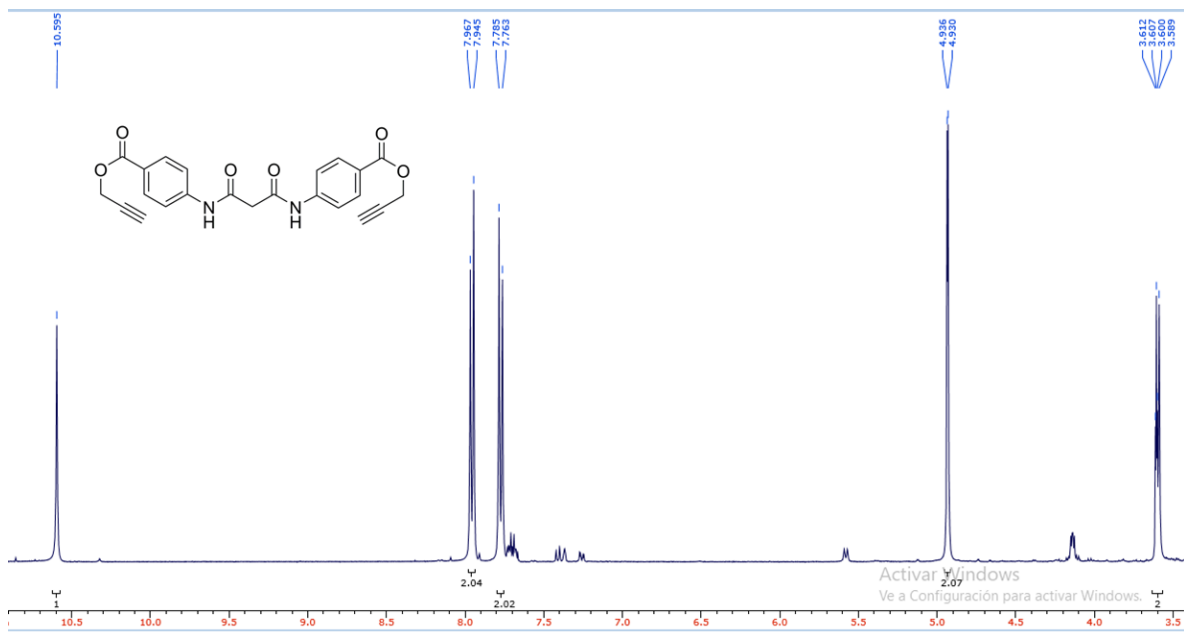

<sup>13</sup>C- NMR of compound 16

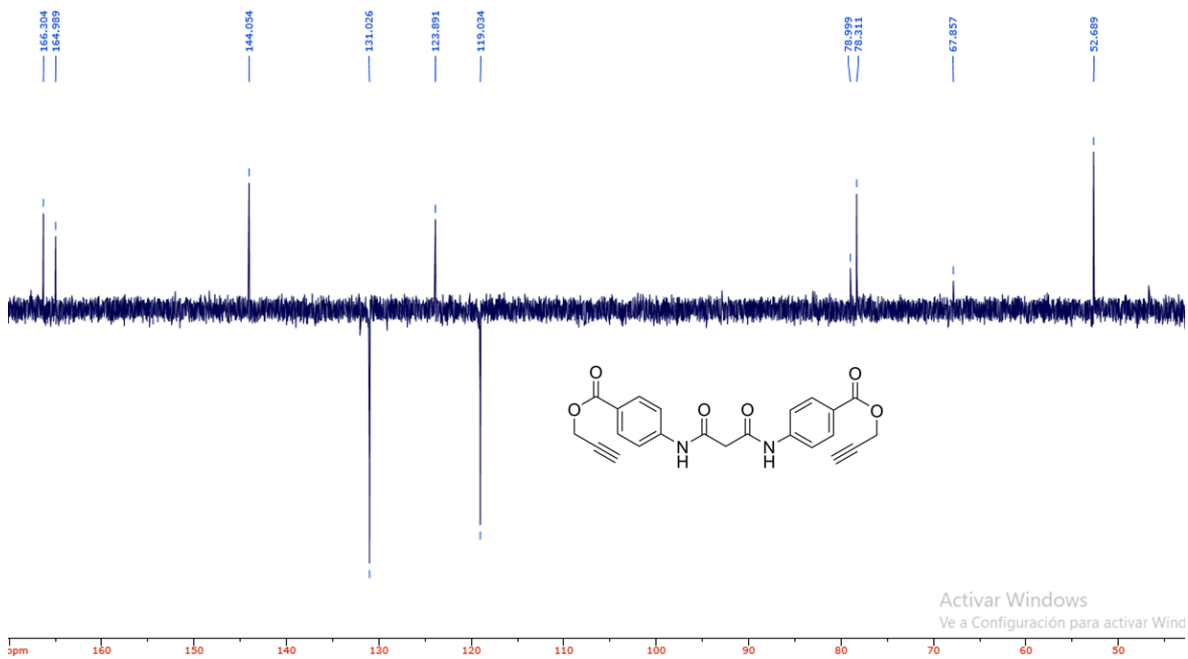

FT-IR of compound 16

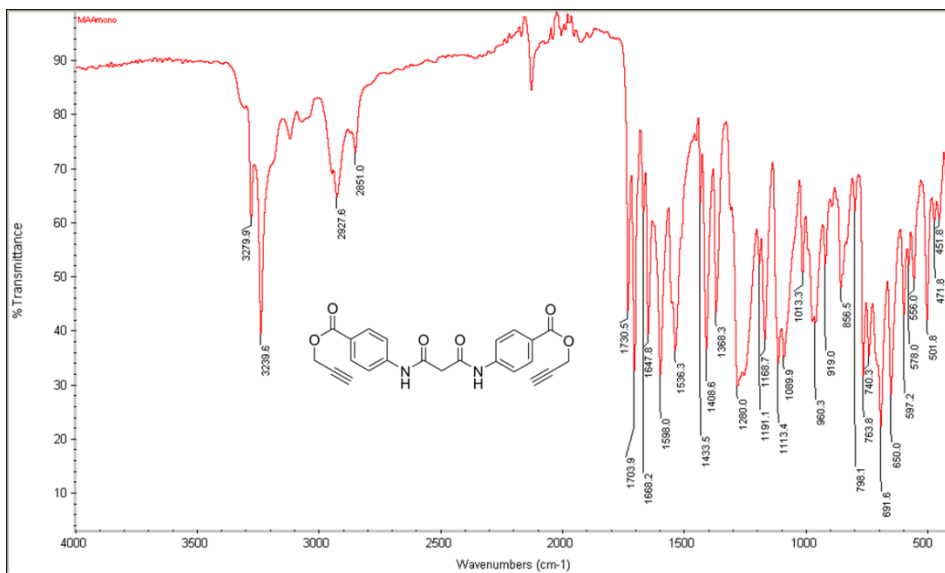

### <sup>1</sup>H- NMR of compound 17

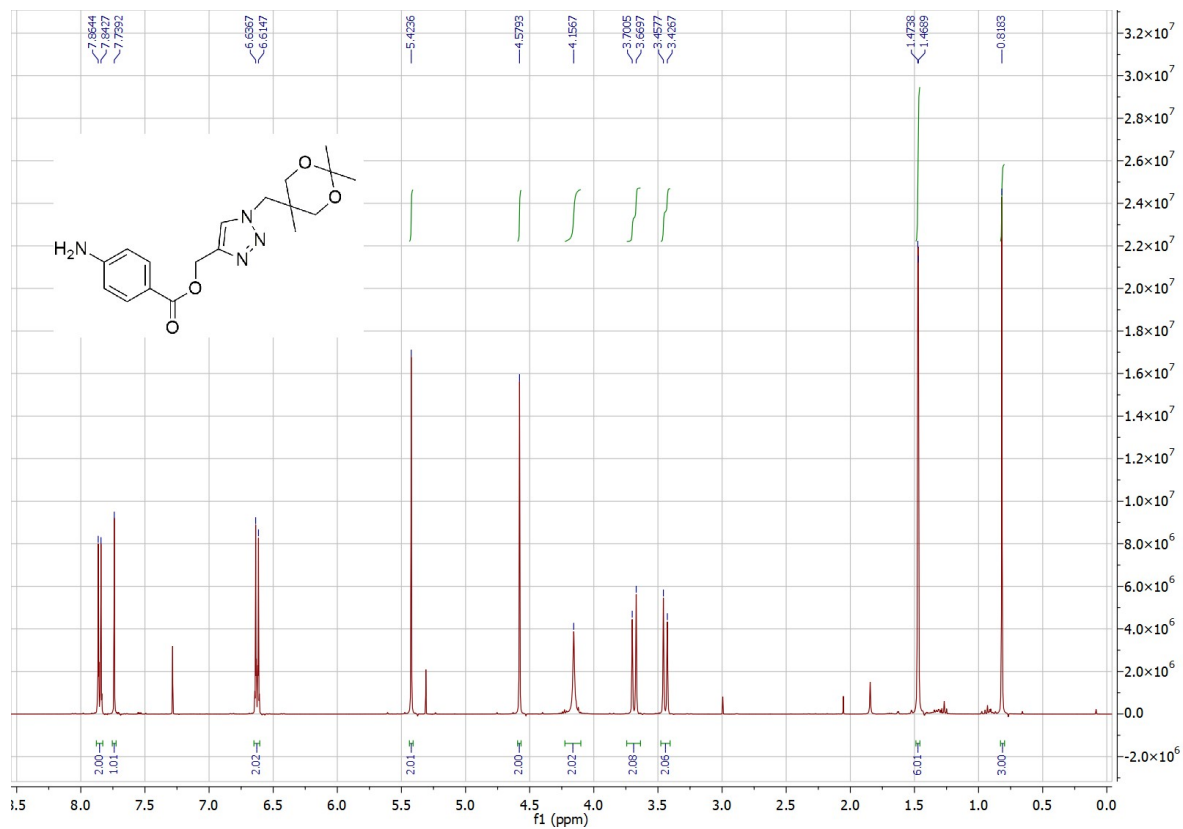

### <sup>13</sup>C- NMR of compound 17

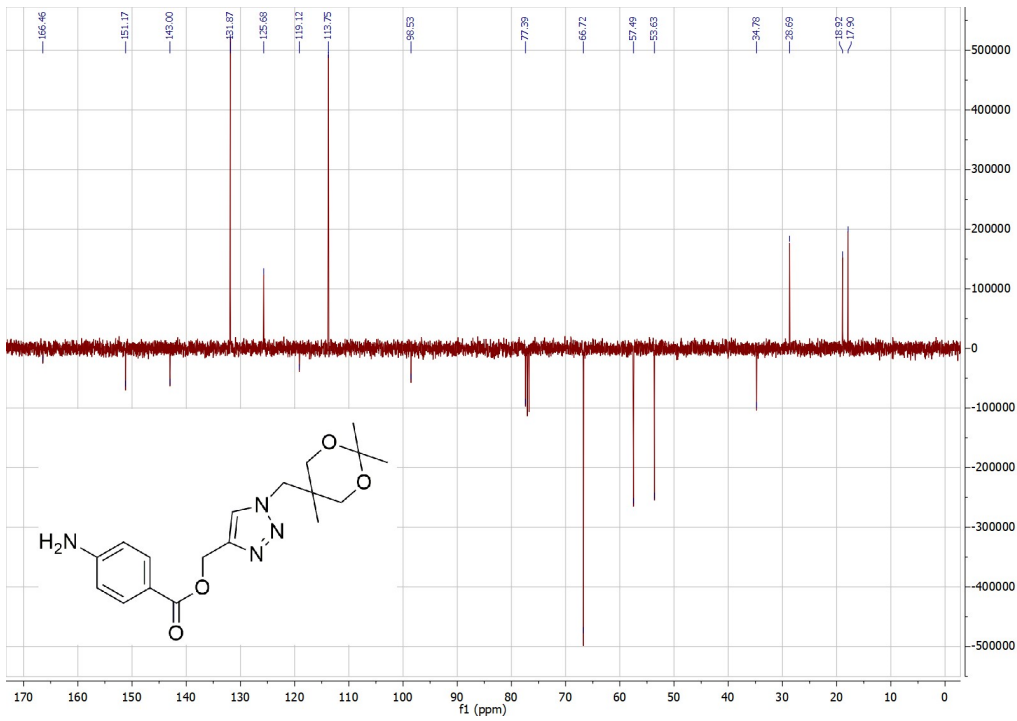

FT-IR of compound 17

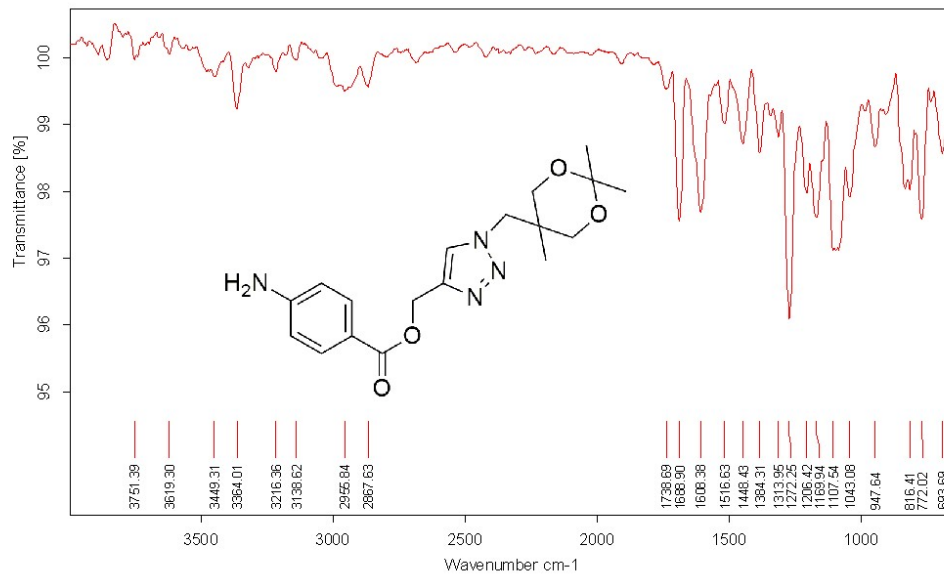

C:\Program Files\OPUS\meas\ATG1P.0    ATG1P    Instrument type and / or accessory    23/08/2023

<sup>1</sup>H- NMR of compound 18

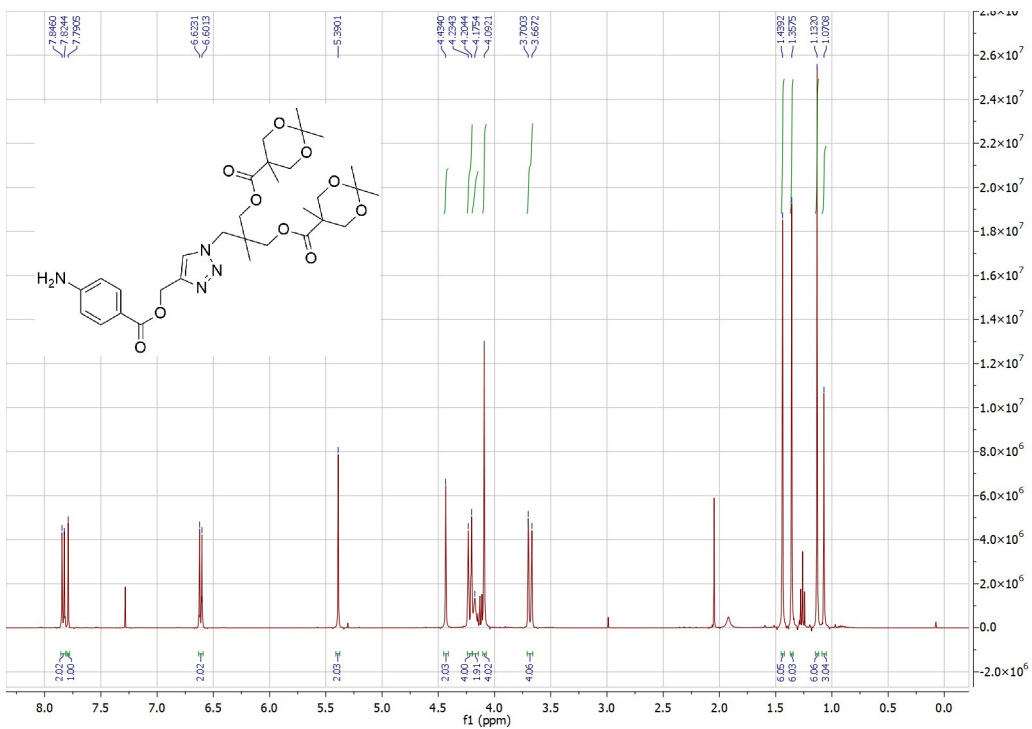

**<sup>13</sup>C- NMR of compound 18**

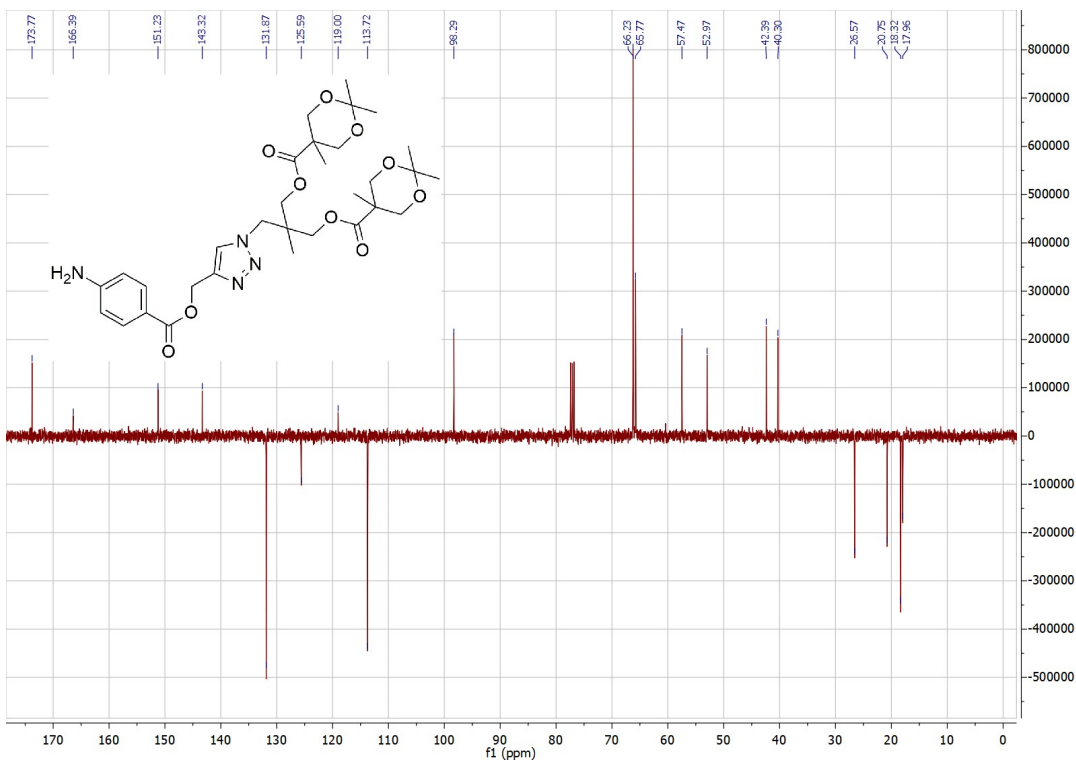

**FT-IR of compound 18**

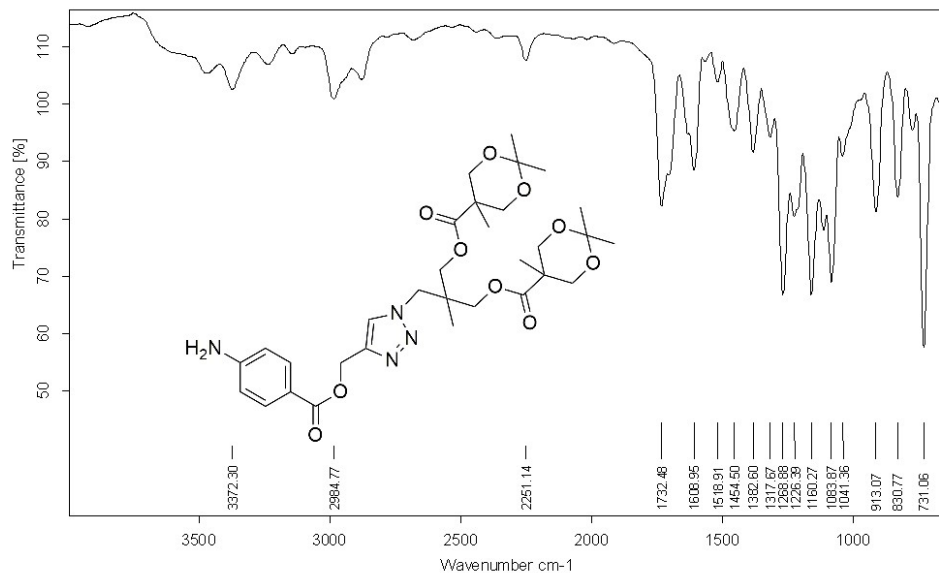

C:\Program Files\OPUS\measVATG2P.D    ATG2P    Instrument type and / or accessory    23/08/2023

### <sup>1</sup>H- NMR of compound 19

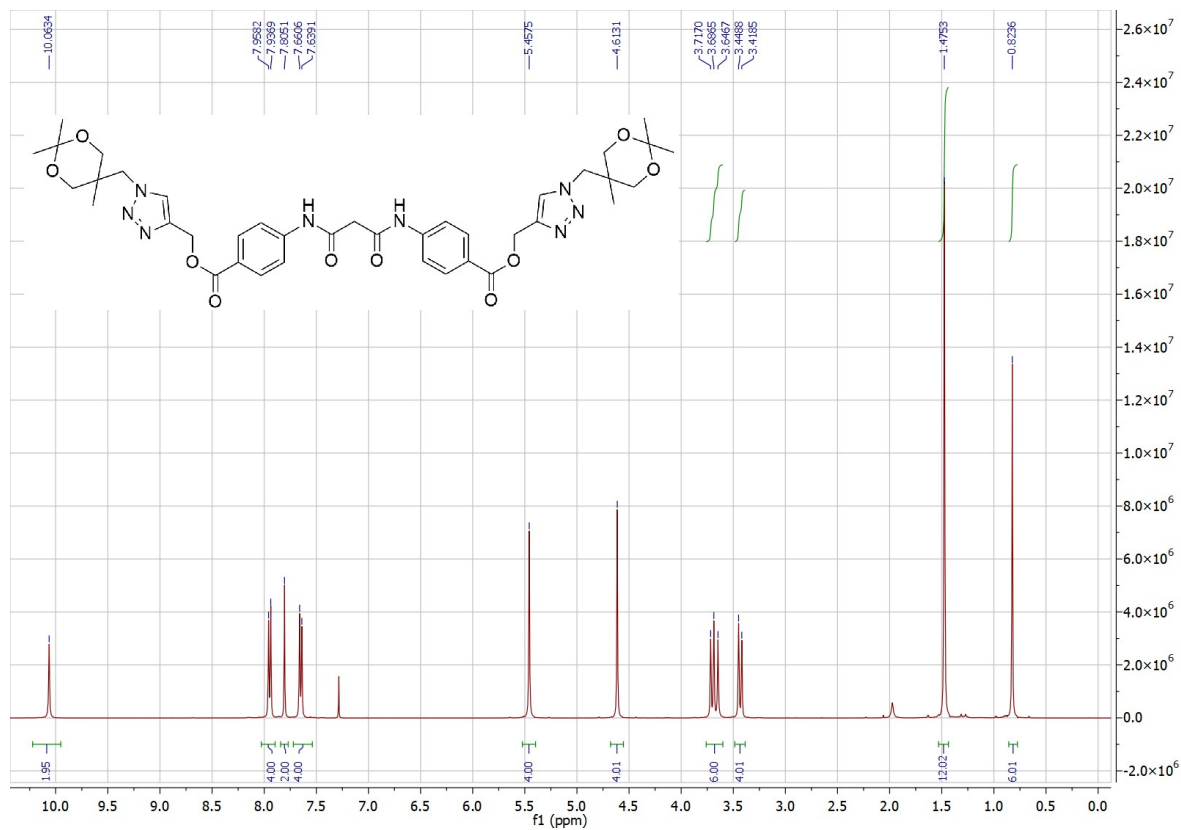

### <sup>13</sup>C- NMR of compound 19



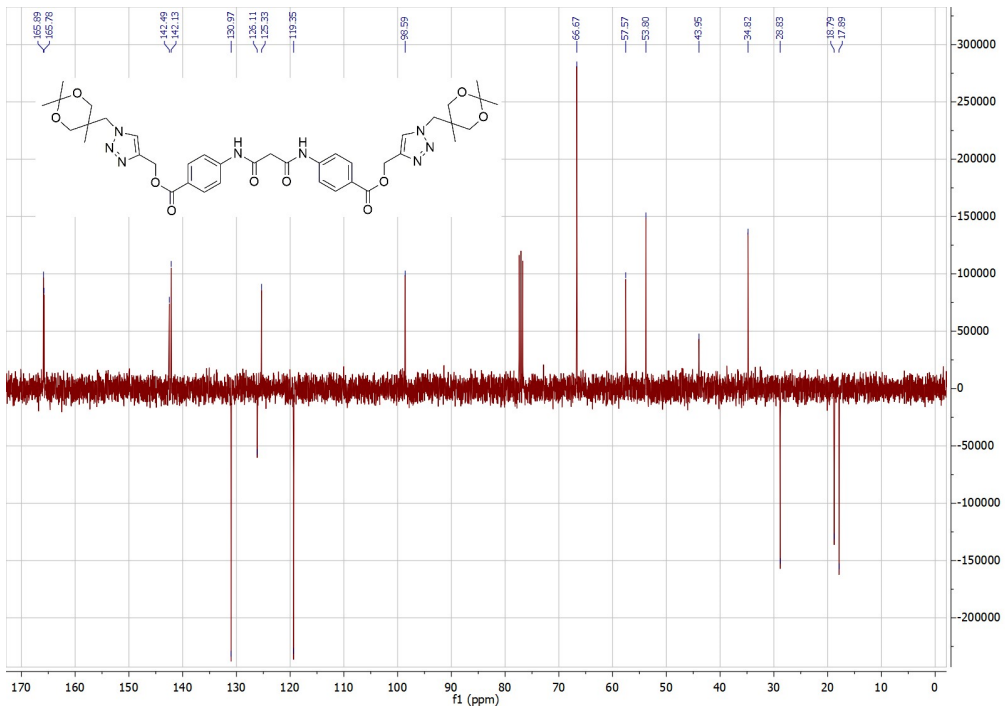

FT-IR of compound 19

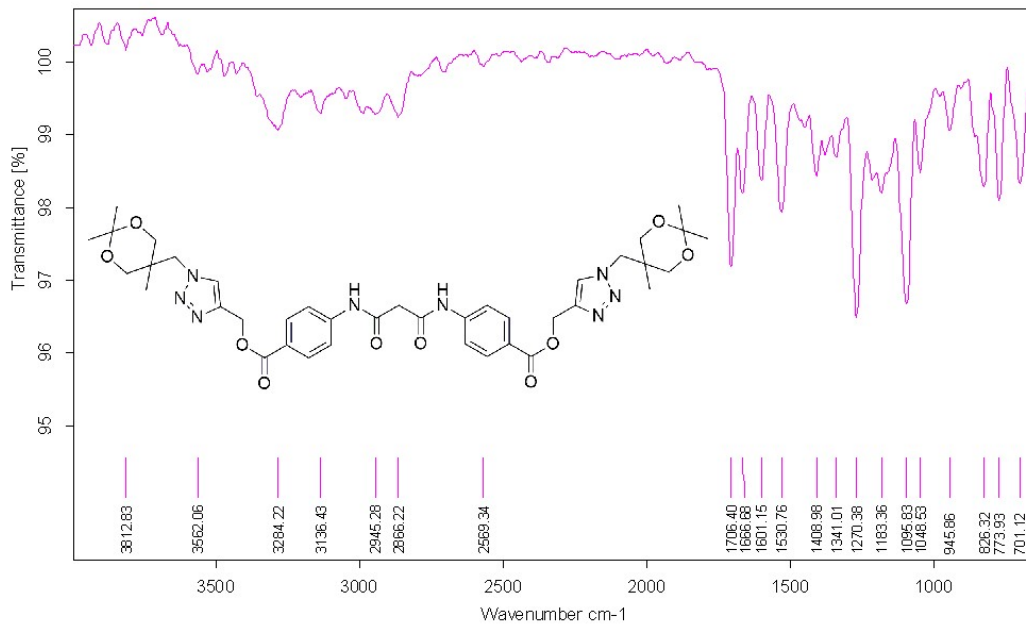

|                                     |        |                                    |            |
|-------------------------------------|--------|------------------------------------|------------|
| C:\Program Files\OPUS\meas\MATG1P.0 | MATG1P | Instrument type and / or accessory | 23/08/2023 |
|-------------------------------------|--------|------------------------------------|------------|

<sup>1</sup>H- NMR of compound 20

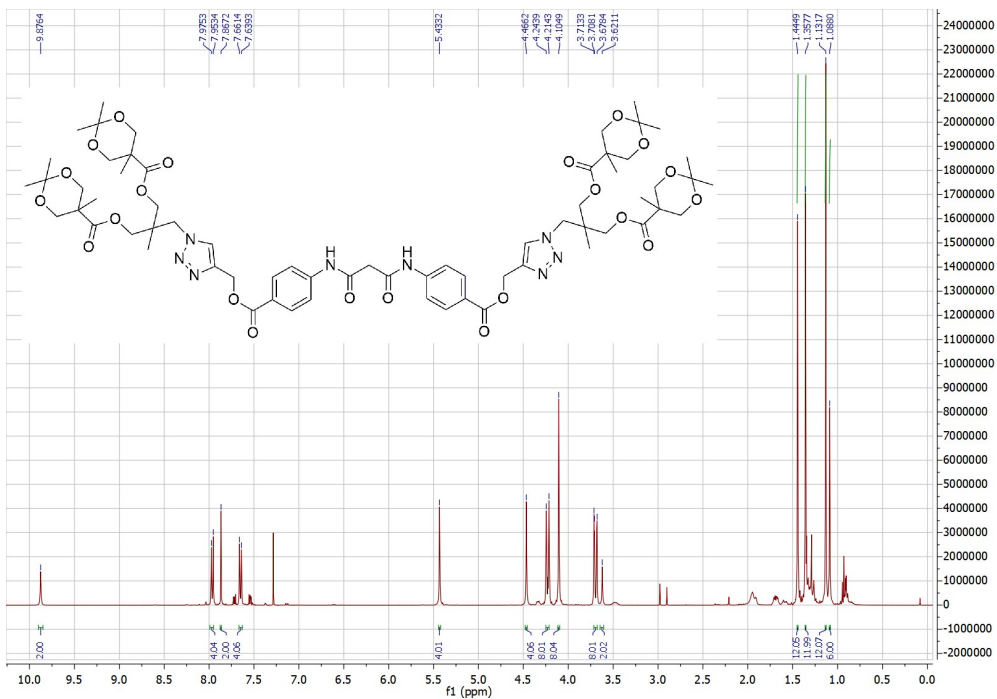

**<sup>13</sup>C- NMR of compound 20**

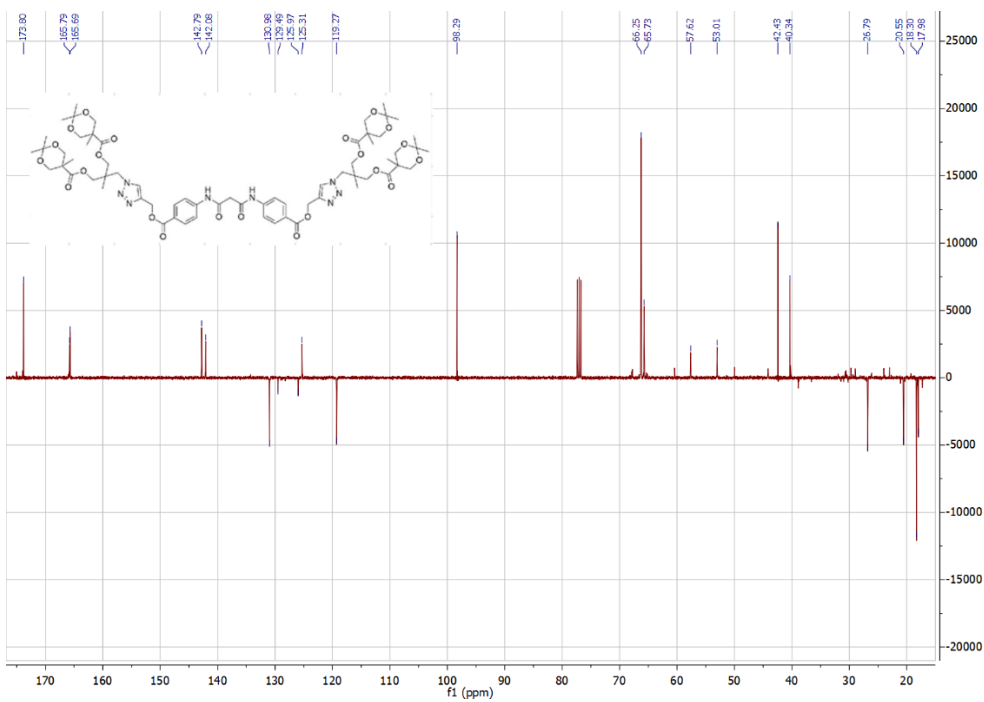

**FT-IR of compound 20**

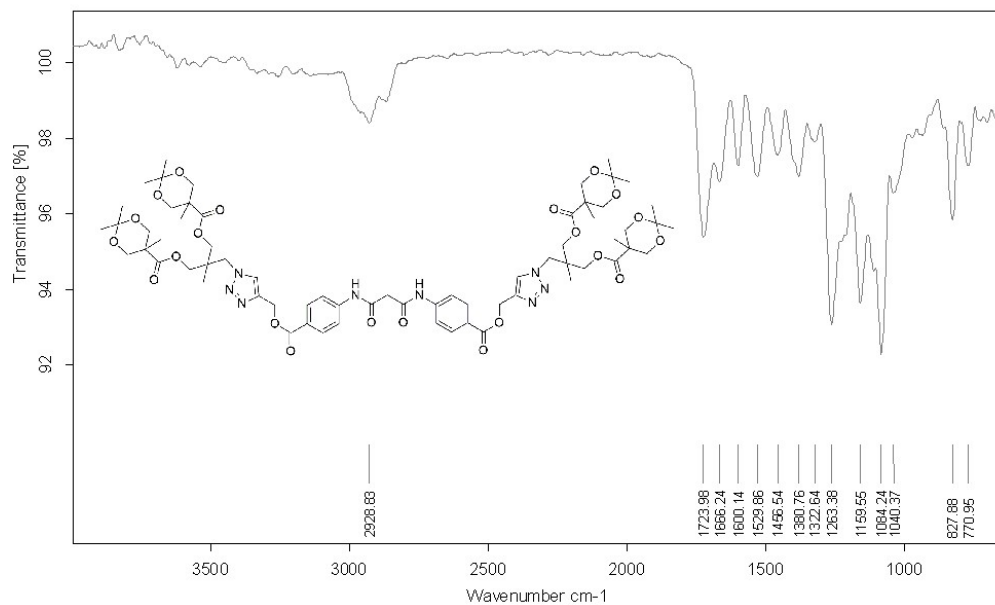

|                                     |        |                                    |            |
|-------------------------------------|--------|------------------------------------|------------|
| C:\Program Files\OPUS\meas\MATG2P.D | MATG2P | Instrument type and / or accessory | 23/08/2023 |
|-------------------------------------|--------|------------------------------------|------------|

Page 1 of 1

### Compound 21

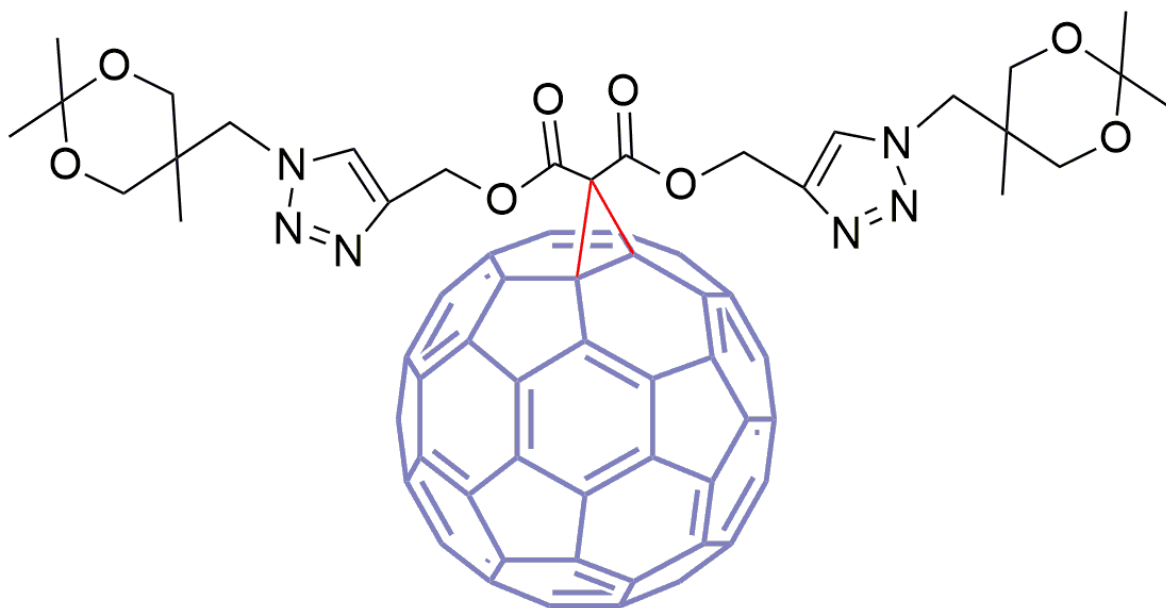

<sup>1</sup>H- NMR of compound 21

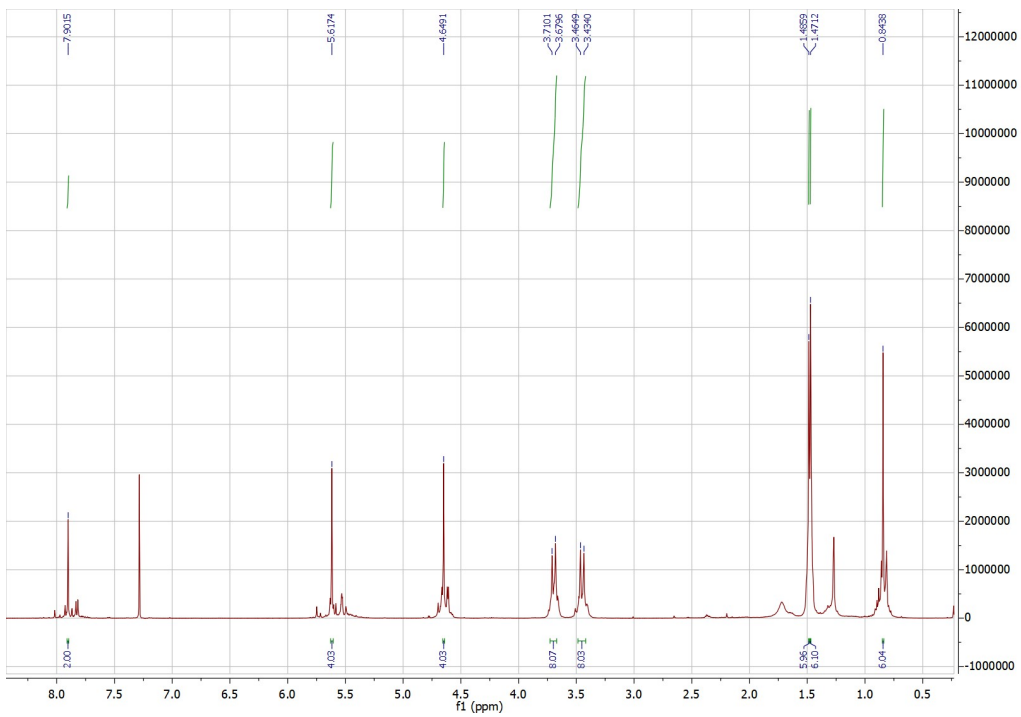

<sup>13</sup>C-NMR of compound 21

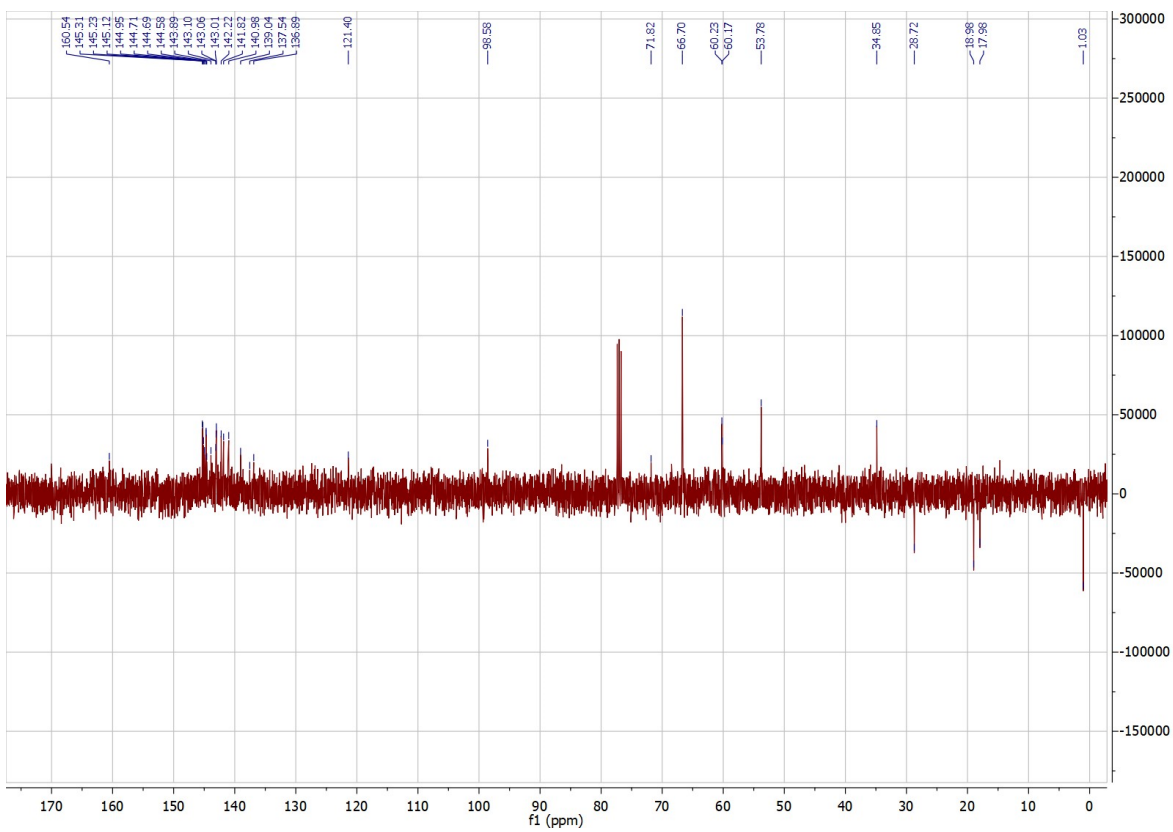

FT-IR of compound 21

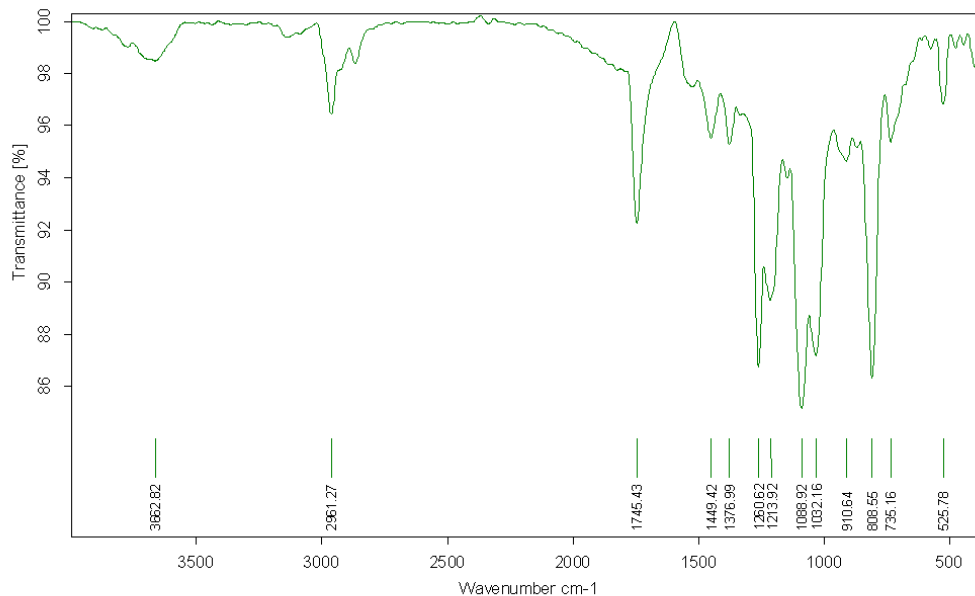

C:\Program Files\OPUS\MEAS\Melchor Martinez H\CARLOS CRUZ\Sample.0 METG1PC60 SOLID 05/09/2023

Page 1 of 1

## MALDI-TOF of compound 21

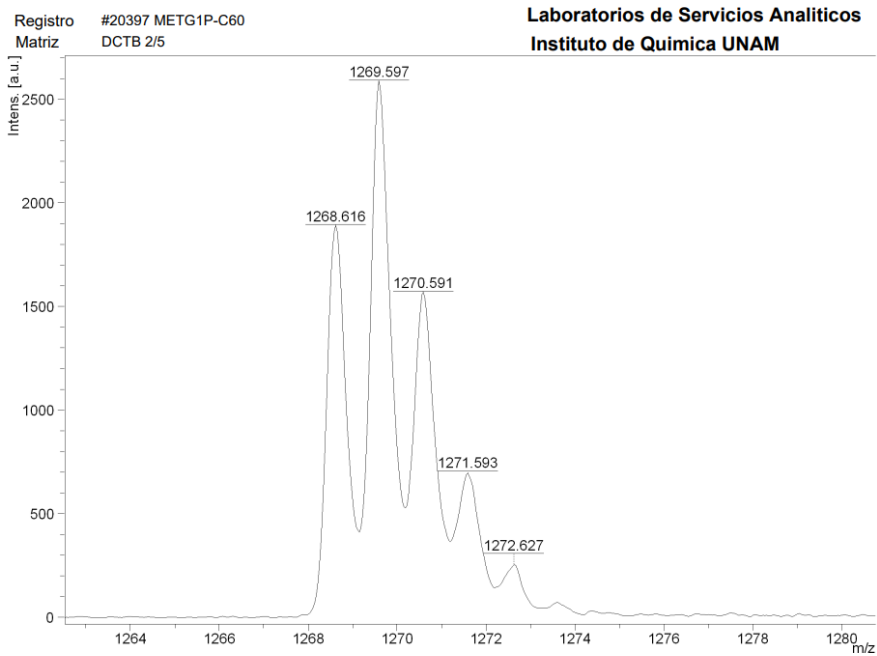

### Acquisition Parameter

|                            |                                                              |
|----------------------------|--------------------------------------------------------------|
| Date of acquisition        | 2023-09-11T13:21:13.843-05:00                                |
| Acquisition method name    | D:\Methods\flexControlMethods\LNМ_UNAMRP_2465_ciclo BIEN.par |
| Acquisition operation mode | Reflector                                                    |
| Voltage polarity           | POS                                                          |

# <sup>1</sup>H-NMR in DMSO-d6 of compound 25

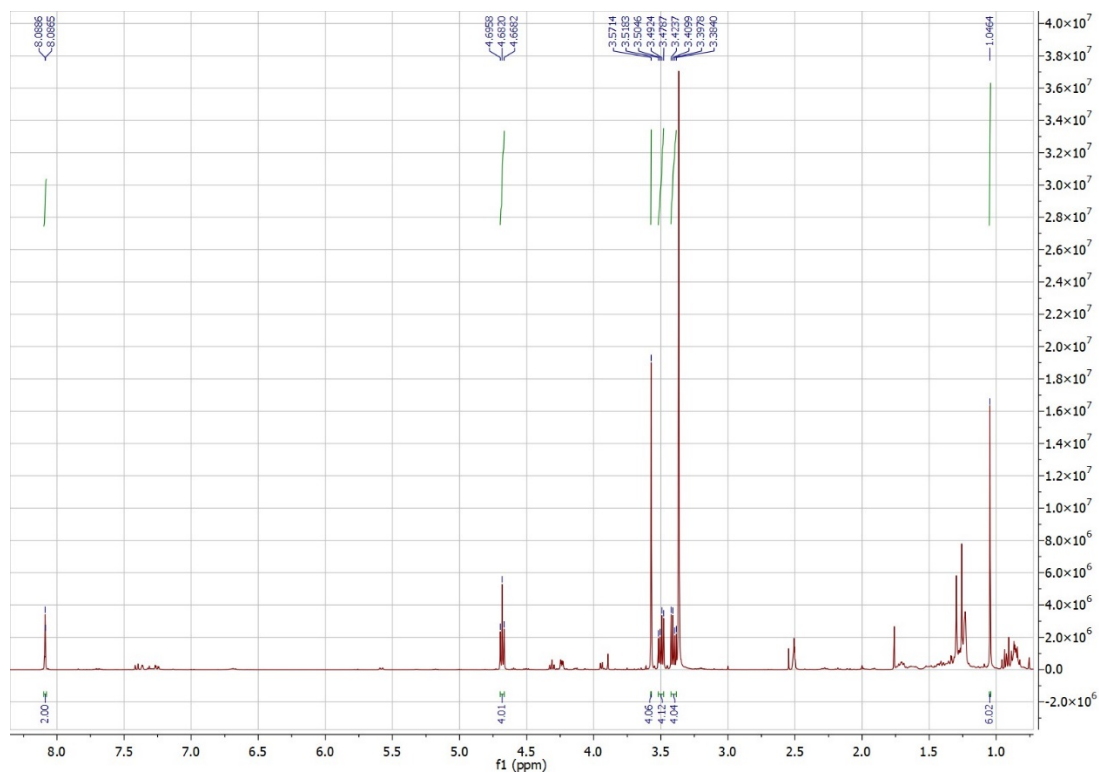

# FT-IR of compound 25

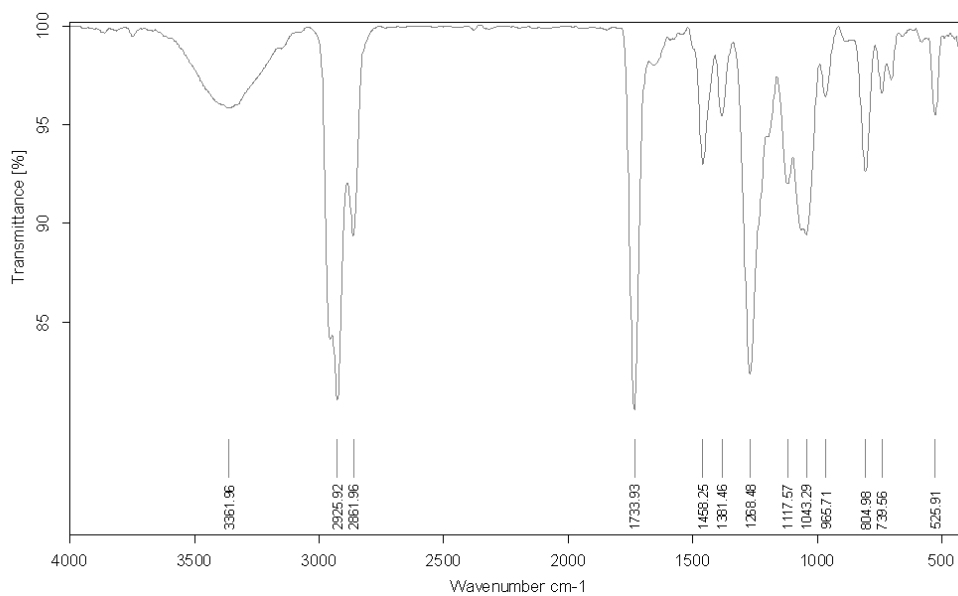

C:\Program Files\OPUS\MEAS\Melchor Martinez HICARLOS CRUZ\Sample.5 cchi Sample form 12/09/2023

# Compound 22

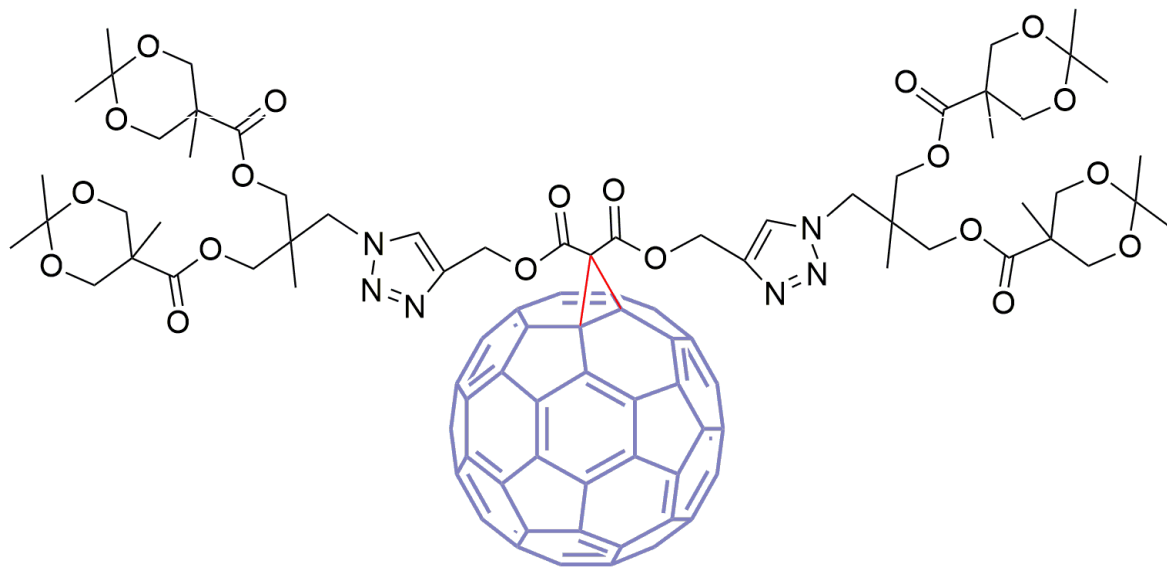

## <sup>1</sup>H-NMR of compound 22

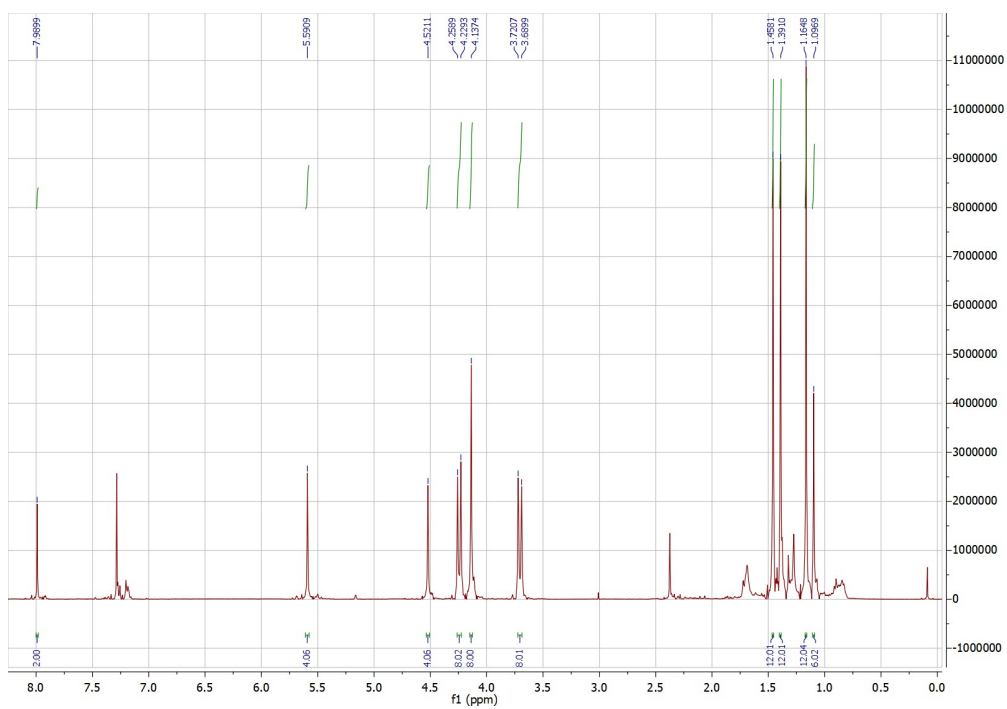

### $^{13}\text{C}$ - NMR of compound **22**

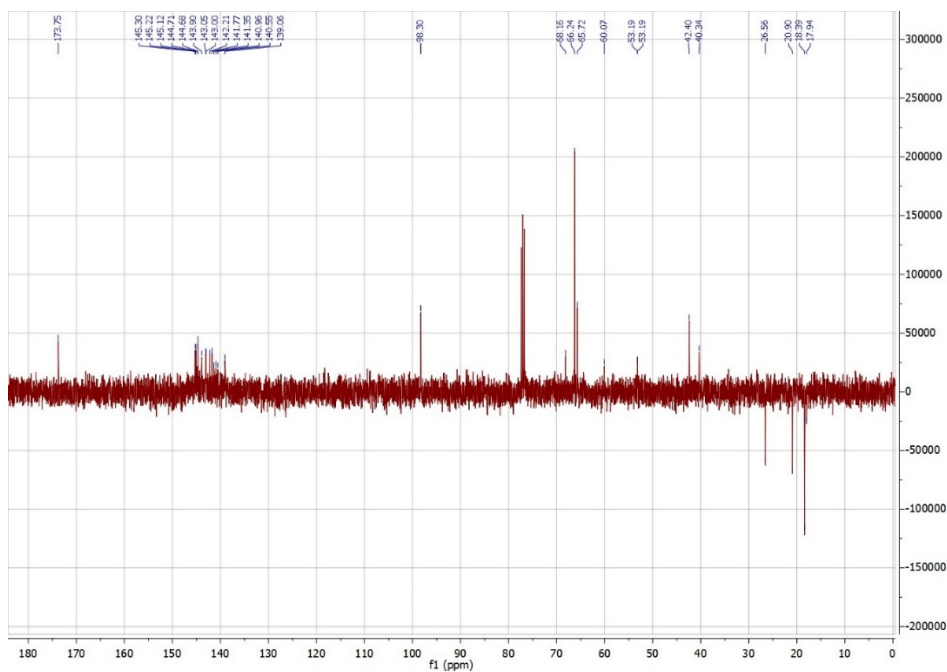

### FT-IR of compound **22**

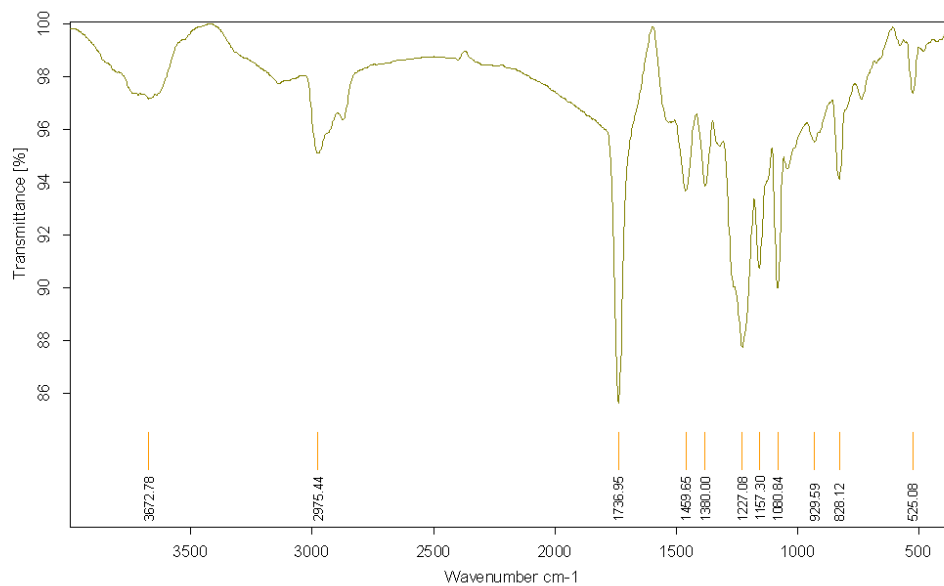

C:\Program Files\OPUS\MEAS\Melchor Martinez H\CARLOS CRUZ\Sample.1 METG2PC60 SOLID

05/09/2023



## MALDI-TOF of compound 22

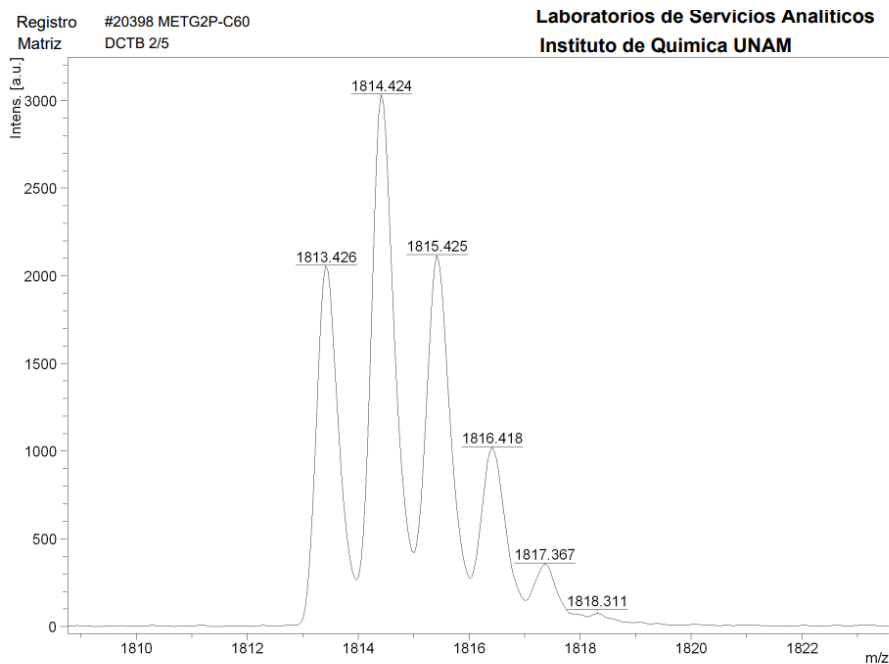

### Acquisition Parameter

Date of acquisition 2023-09-11T13:25:26.531-05:00  
Acquisition method name D:\Methods\flexControlMethods\LNM\_UNAMRP\_2465\_ciclo BIEN.par  
Acquisition operation mode Reflector  
Voltage polarity POS

## $^1\text{H-NMR}$ in DMSO- $d_6$ of compound 26

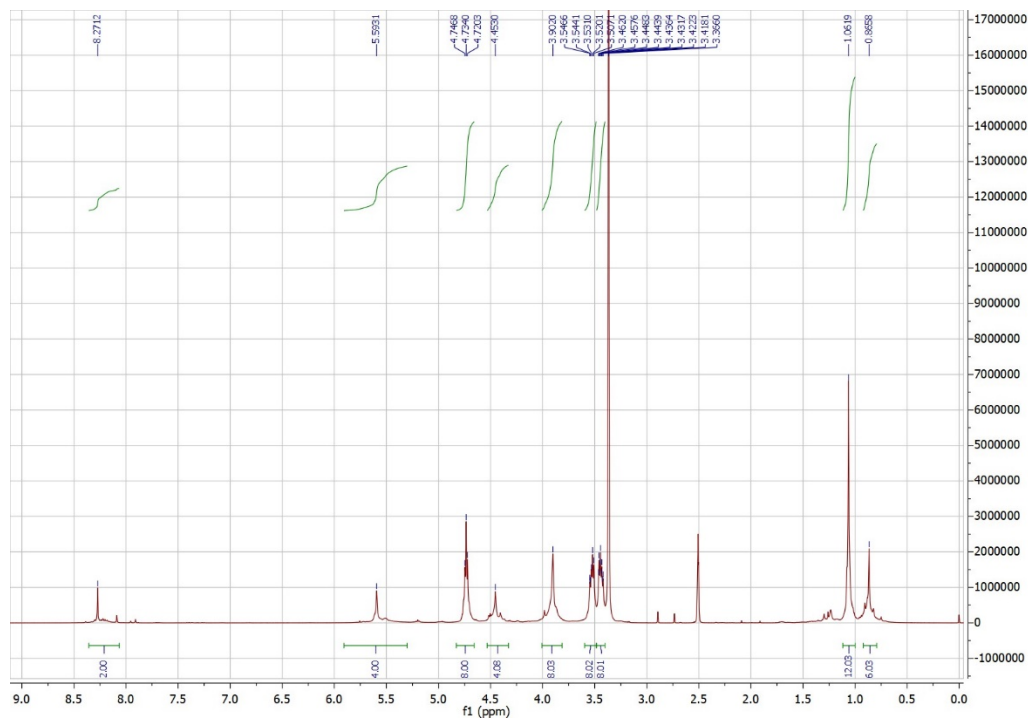

### FT-IR of compound 26

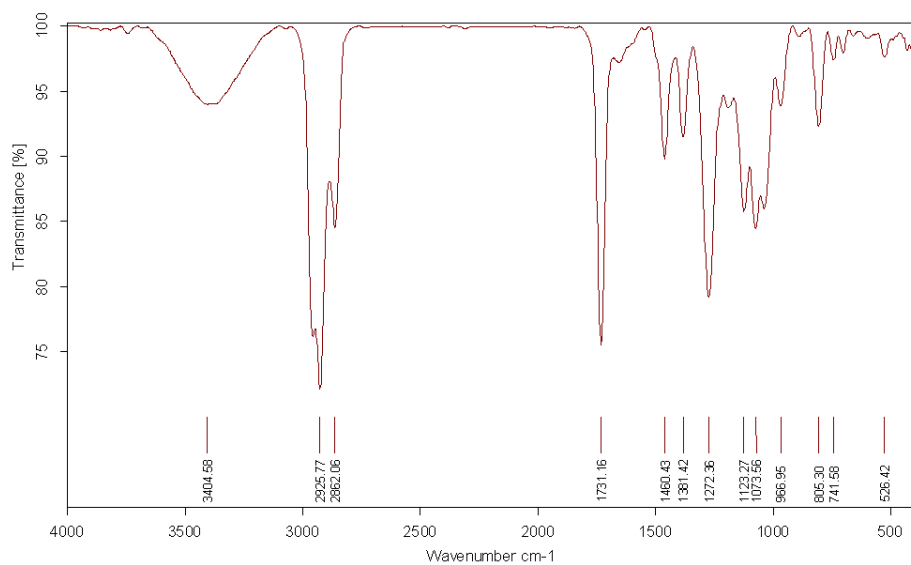

C:\Program Files\TOPUS\MEAS\Melchor Martinez H\CARLOS CRUZ\Sample 6 cchii Sample form

12/09/2023

Page 1 of 1

### Compound 23

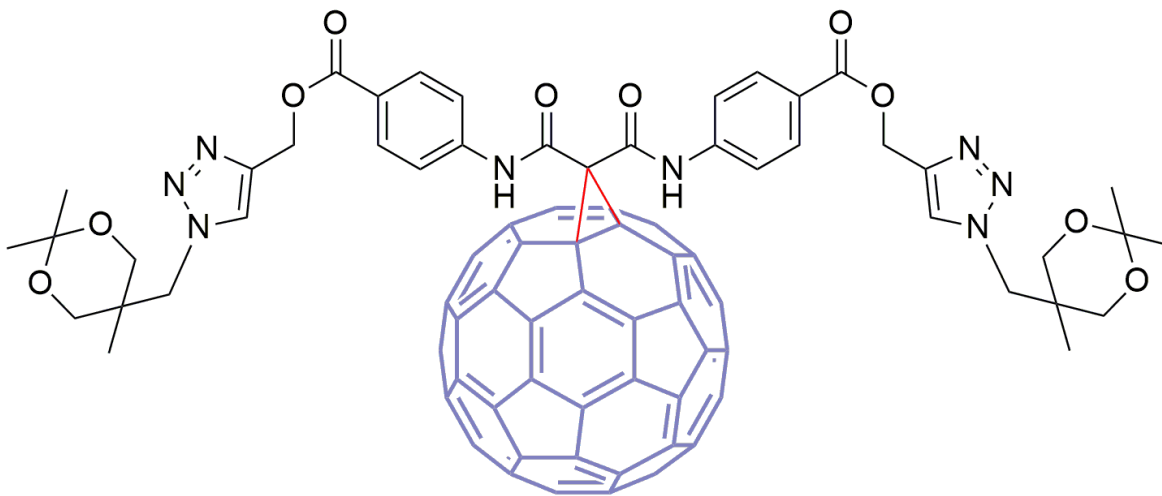

# <sup>1</sup>H- NMR of compound 23

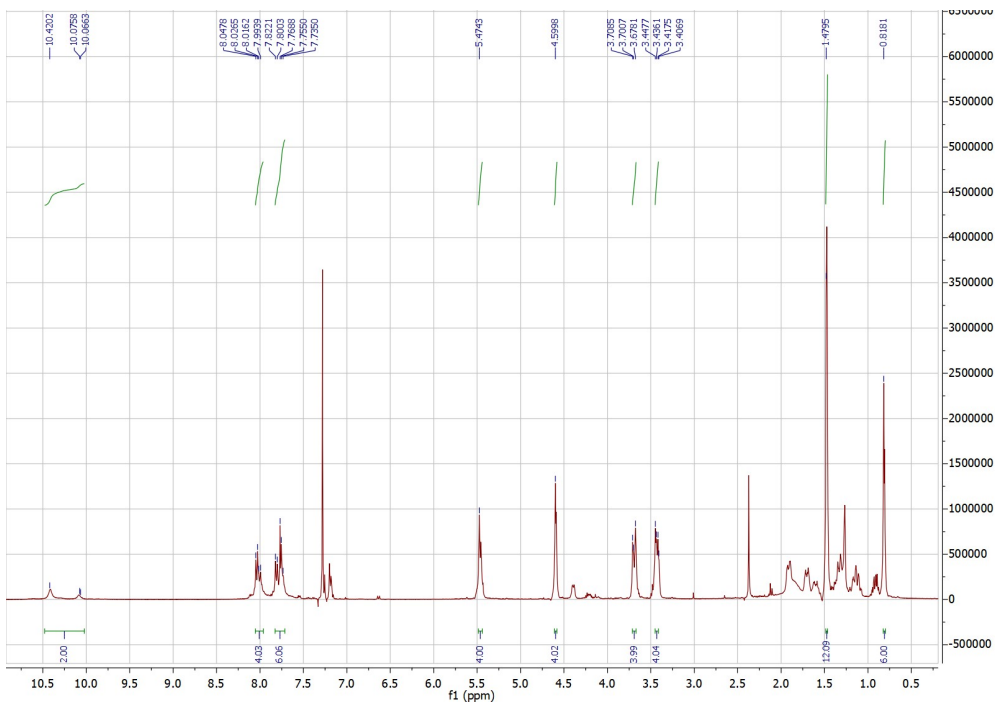

# FT-IR of compound 23

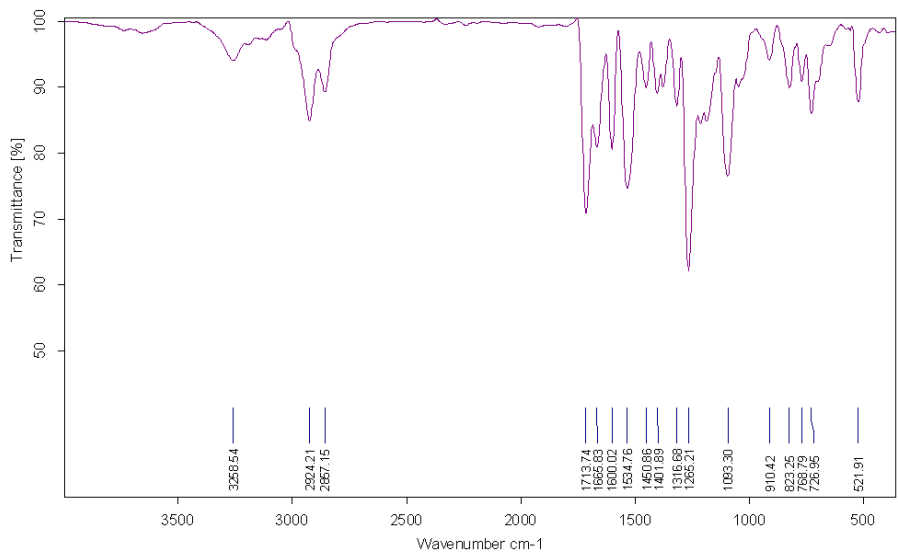

C:\Program Files\OPUS\MEAS\Melchor Martinez HICARLOS CRUZ\Sample.2    MATG1PC60    SOLID    05/09/2023

## $^1\text{H}$ - NMR of compound **23**

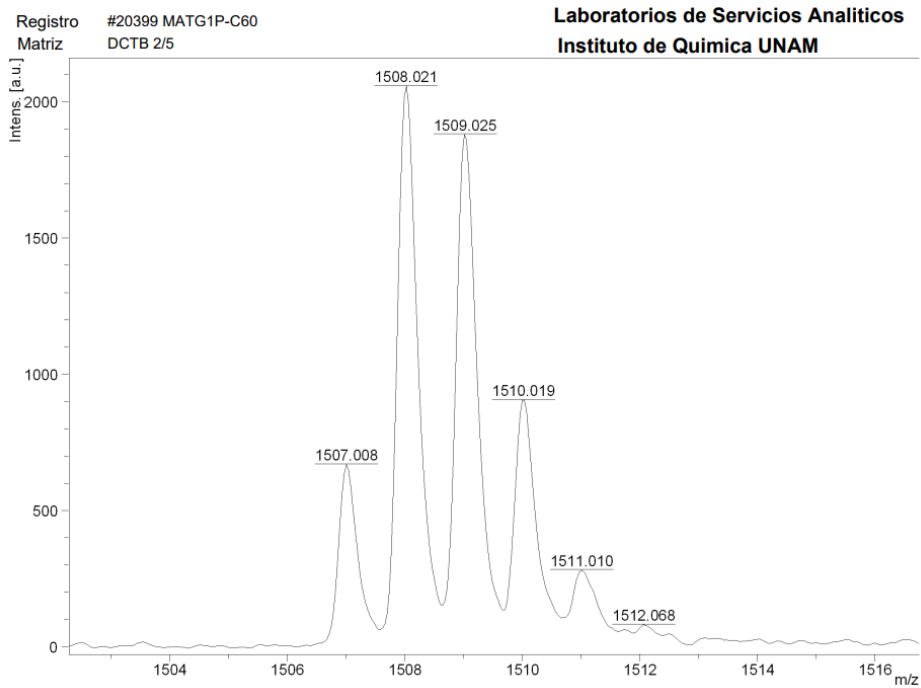

### Acquisition Parameter

Date of acquisition 2023-09-11T13:42:32.359-05:00  
Acquisition method name D:\Methods\flexControlMethods\LNM\_UNAM\RP\_2465\_ciclo BIEN.par  
Acquisition operation mode Reflector  
Voltage polarity POS

## Compound **24**

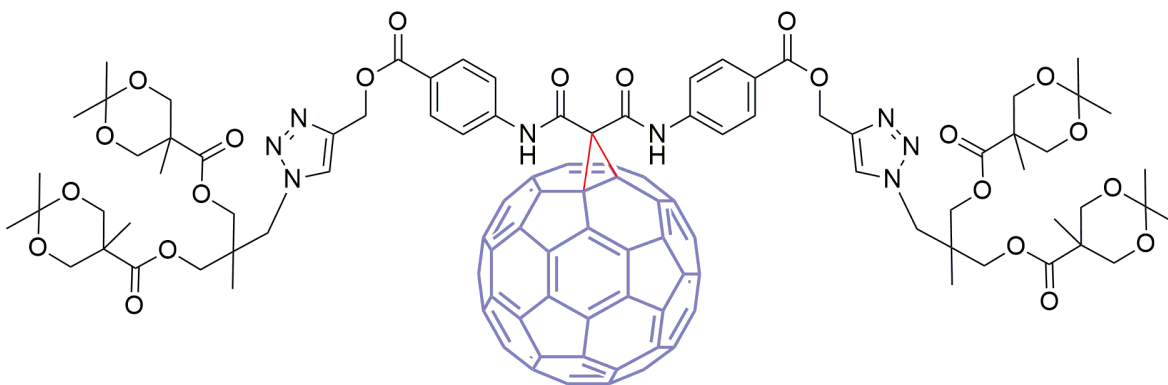

## $^1\text{H}$ - NMR of compound **24**

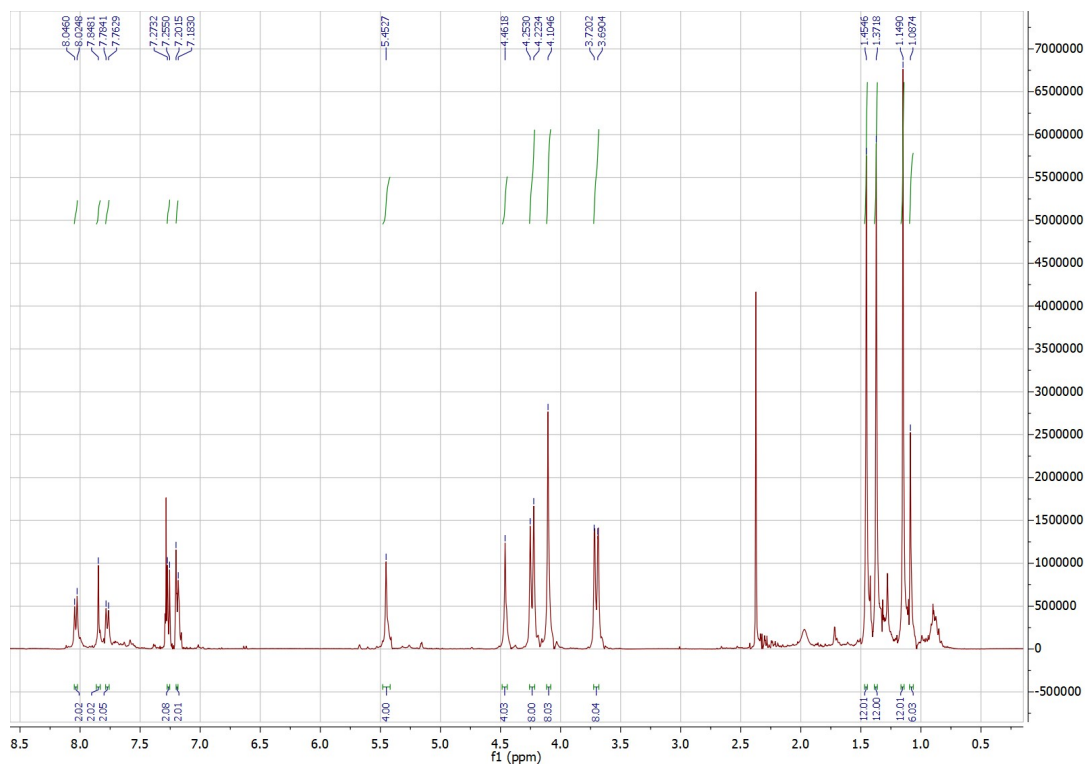

<sup>13</sup>C- NMR of compound 24

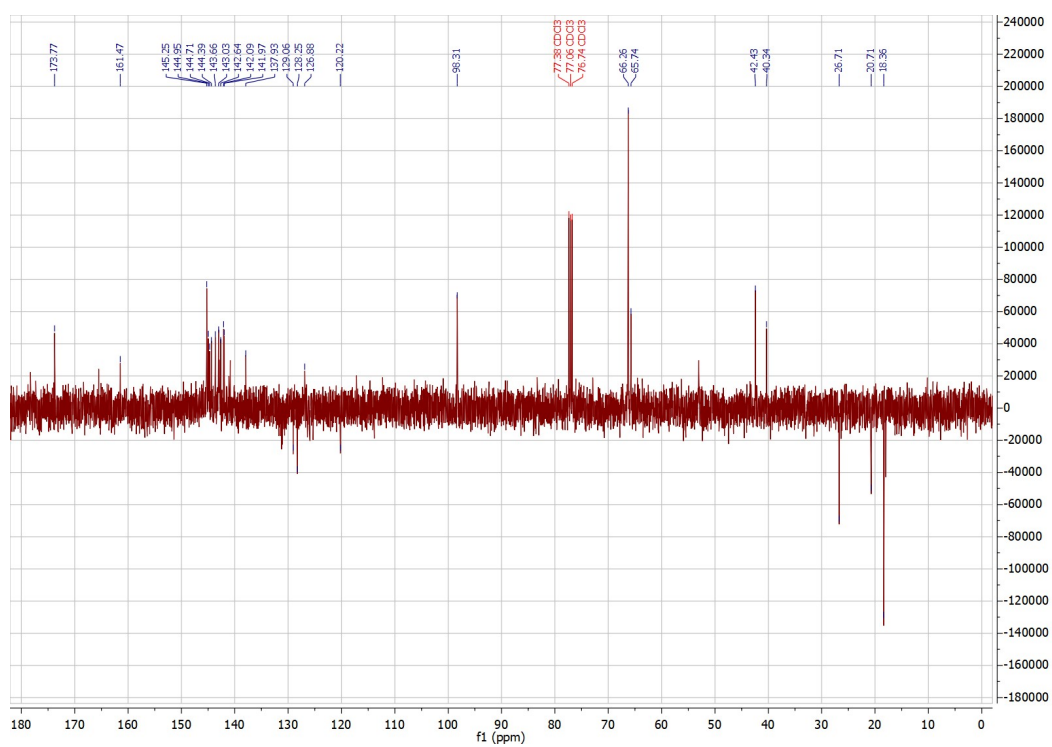

### FT-IR of compound 24

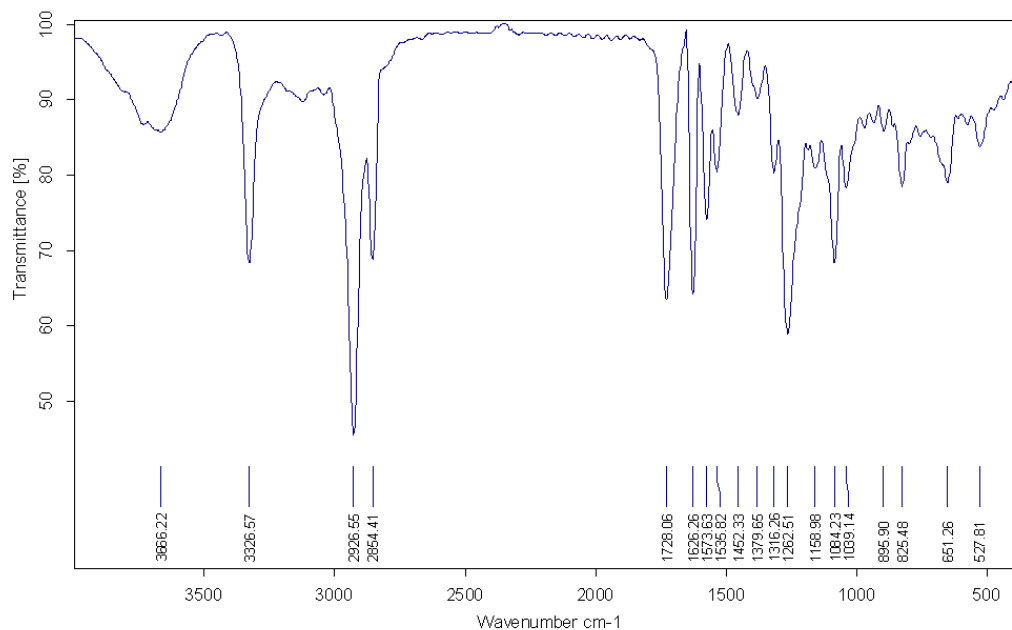

|                                                                    |           |       |            |
|--------------------------------------------------------------------|-----------|-------|------------|
| C:\Program Files\OPUS\MEAS\Melchor Martinez HICARLOS CRUZ\Sample.3 | MATG2PC60 | SOLID | 05/09/2023 |
|--------------------------------------------------------------------|-----------|-------|------------|

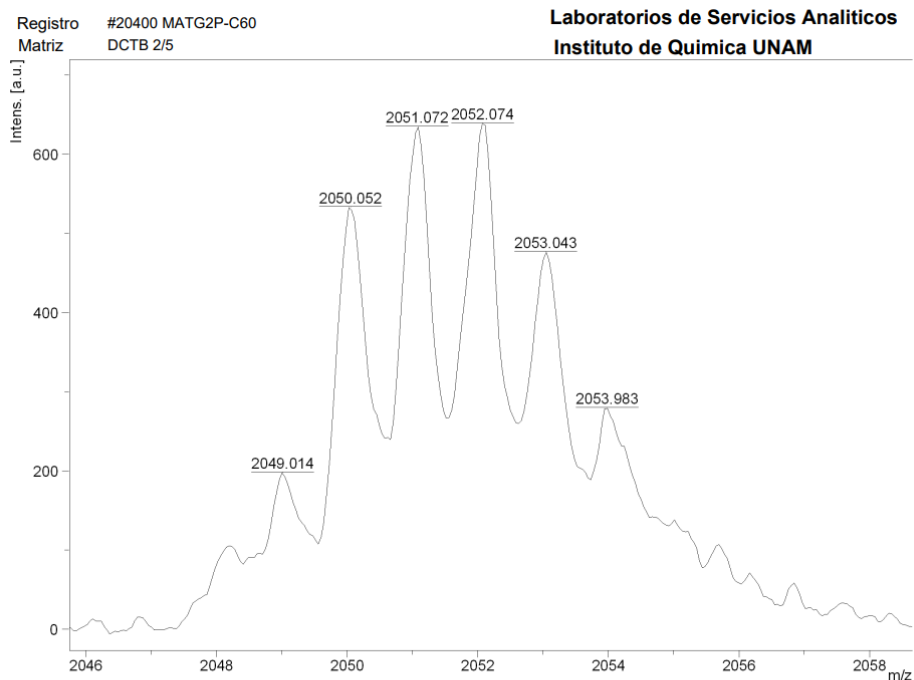

**Acquisition Parameter**

|                            |                                                                |
|----------------------------|----------------------------------------------------------------|
| Date of acquisition        | 2023-09-11T13:46:17.750-05:00                                  |
| Acquisition method name    | D:\Methods\flexControlMethods\LNLM_UNAM\RP_2465_ciclo BIEN.par |
| Acquisition operation mode | Reflector                                                      |
| Voltage polarity           | POS                                                            |

### 3. UV-vis analysis of compounds **21** – **24**

Spectra were measured in 50  $\mu\text{M}$  solutions in Chlorobenzene.

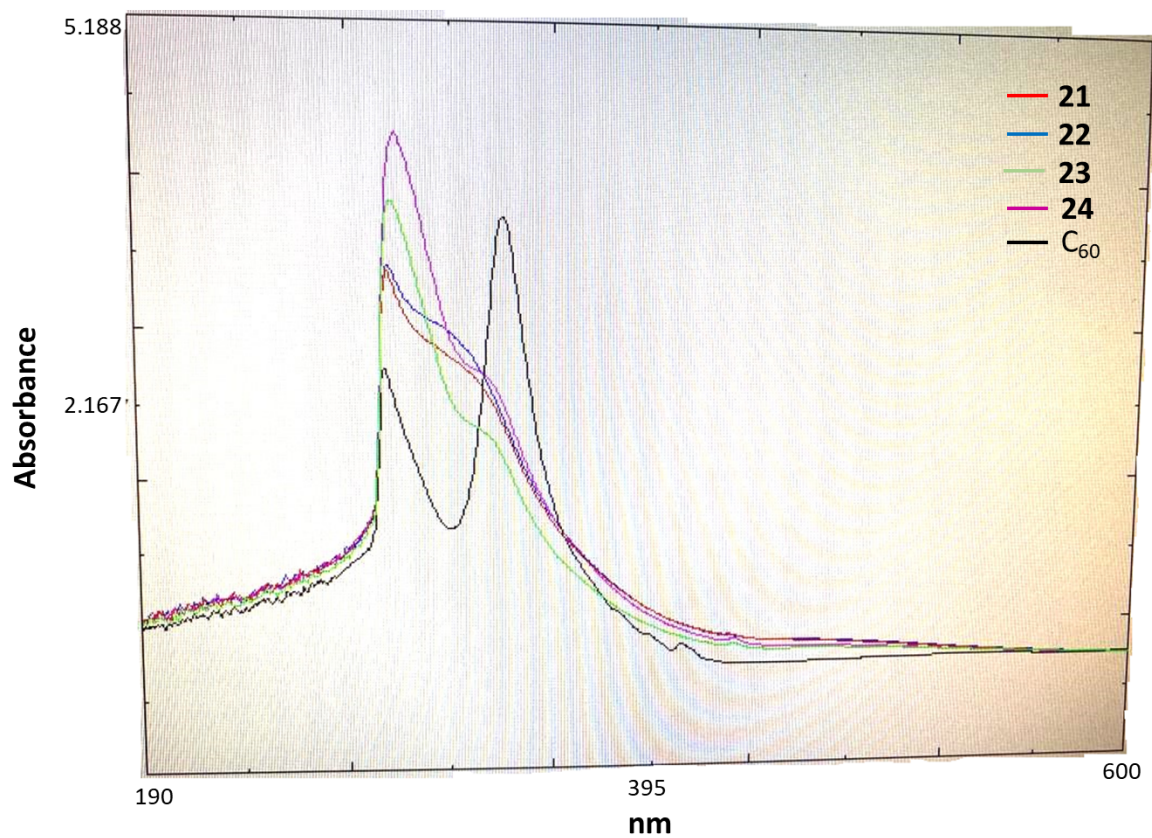

| Compound        | $\lambda_{\text{Max}}$ (nm) |
|-----------------|-----------------------------|
| C <sub>60</sub> | 287 and 334                 |
| <b>21</b>       | 287.5                       |
| <b>22</b>       | 288.0                       |
| <b>23</b>       | 289.5                       |
| <b>24</b>       | 291.5                       |
